1 **Rare *CRHR2* and *GRM8* variants identified as candidate factors associated with eating**  
2 **disorders in Japanese patients.**

3

4 **Akira Oka<sup>1,2\*</sup>, Shinji Hadano<sup>1,2,4</sup>, Mahoko Takahashi Ueda<sup>3</sup>, So Nakagawa<sup>1,2,4</sup>, Gen Komaki<sup>5</sup>,**  
5 **Tetsuya Ando<sup>6,7</sup>**

6

7 <sup>1</sup>Department of Molecular Life Sciences, Division of Basic Medical Science and Molecular  
8 Medicine, Tokai University School of Medicine, 143 Shimokasuya, Isehara, Kanagawa 259-1193,  
9 Japan

10 <sup>2</sup>The Institute of Medical Sciences, Tokai University, 143 Shimokasuya, Isehara, Kanagawa,  
11 259-1193, Japan

12 <sup>3</sup>Department of Genomic Function and Diversity, Medical Research Institute, Tokyo Medical and  
13 Dental University, Bunkyo, Tokyo, 113-8510 Japan

14 <sup>4</sup>Micro/Nano Technology Center, Tokai University, Hiratsuka, Kanagawa, Japan

15 <sup>5</sup> Faculty of Medical Science, Fukuoka International University of Health and Welfare,  
16 Momochihama, Sawara-ku, Fukuoka 814-0001, Japan

17 <sup>6</sup>Department of Psychosomatic Medicine, Faculty of Medicine, School of Medicine, International  
18 University of Health and Welfare, 4-3 Kozunomori, Narita, Chiba 286-8686, Japan

19 <sup>7</sup>Department of Behavioral Medicine, National Institute of Mental Health, National Center of  
20 Neurology and Psychiatry, 4-1-1 Ogawa-higashi, Kodaira, Tokyo 187-8553, Japan

21 \* Corresponding author

22 Email: [oka246@is.icc.u-tokai.ac.jp](mailto:oka246@is.icc.u-tokai.ac.jp)

23

24 **Keywords.** Eating disorder, *CRHR2*, *GRM8*, whole exome sequencing, affected sib-pair

25

1    **Abstract**

2    Eating disorders (EDs) are a type of psychiatric disorder characterized by pathological eating and  
3    related behavior and considered to be highly heritable. The purpose of this study was to explore rare  
4    variants expected to display biological functions associated with the etiology of EDs. We performed  
5    whole exome sequencing (WES) of affected sib-pairs corresponding to disease subtype through their  
6    lifetime and their parents. From those results, rare single nucleotide variants (SNVs) concordant with  
7    sib-pairs were extracted and estimated to be most deleterious in the examined families. Two  
8    non-synonymous SNVs located on corticotropin releasing hormone receptor 2 (*CRHR2*) and  
9    glutamate metabotropic receptor 8 (*GRM8*) were identified as candidate disease susceptibility factors.  
10   The SNV of *CRHR2* was included within the cholesterol binding motif of the transmembrane helices  
11   region, while the SNV of *GRM8* was found to contribute to hydrogen bonds for an  $\alpha$ -helix structure.  
12   *CRHR2* plays important roles in the serotonergic system of dorsal raphe nuclei, which is involved  
13   with feeding and stress-coping behavior. Moreover, *GRM8* modulates glutamatergic  
14   neurotransmission, and is also considered to have effects on dopaminergic and adrenergic  
15   neurotransmission. Further investigation regarding the biological function of these variants may  
16   provide an opportunity for elucidate the pathogenesis of EDs.

17

18

## 1 **1. Introduction**

2 Eating behavior can be severely affected by eating disorders (EDs), including anorexia nervosa (AN)  
3 and bulimia nervosa (BN). The main manifestations of AN are dietary restriction, fasting, excessive  
4 exercise, or other weight control or loss behaviors as resistance to maintenance of normal body  
5 weight. On the other hand, BN is characterized by repeated binge eating and inadequate  
6 compensatory behaviors to avoid weight gain. Manifestations shared by these disorders include  
7 aspiration for weight loss, fear of weight gain, and self-evaluation unduly influenced by body shape  
8 and weight. Moreover, twin and familial studies demonstrated that genetic predisposition to AN and  
9 BN is shared, at least in part [1-3]. The Diagnostic and Statistical Manual of Mental Disorders  
10 (DSM-5) provides diagnostic criteria for a subgroup of AN defined as restricting type (AN-R),  
11 which include severe dietary restriction without regular binge eating and/or purging behaviors, as  
12 well as binge-eating/purging type (AN-BP) with regular binge eating and/or purging behaviors.

13 A recent GWAS for AN in European identified eight significant common variants [4].  
14 However, that study captured only 1.7% of the phenotypic variance, thus additional subjects would  
15 be required for future replication studies [4]. On the other hand, a sequencing study with linkage  
16 analysis was performed using two large families with AN and BN, and those findings suggested that  
17 each rare missense variant in estrogen-related receptor  $\alpha$  (*ESRRA*) and histone deacetylase 4  
18 (*HDAC4*) is associated with EDs [3]. *ESRRA* null mice also display behavioral deficits relevant to  
19 EDs such as AN [5]. Moreover, *HDAC4*<sup>A778T</sup> mice carrying the missense variant demonstrate several  
20 ED-related feeding and behavioral deficits in a gender-dependent manner [6, 7].

21 Swedish twin study for EDs demonstrated that concordance rates in monozygotic twins  
22 were higher than dizygotic twins within the same disease subtype, on the other hand, the rates were  
23 similar in the different subtype [1]. Therefore, in the current study, to use subjects expected to be  
24 higher heritability we selected seven affected sib-pairs corresponding to disease subtype through  
25 their lifetime for whole exome sequencing (WES) for exploring rare variants functionally related to  
26 the pathogenesis of EDs. However, the statistical power was quite insufficient to perform genetic  
27 association and linkage analysis. Therefore, we explored the most deleterious coding variants shared

1 with sib-pairs in each family.

2

## 3 **2. Materials and methods**

### 4 *2.1 Patients and families*

5 Upon approval of the experimental procedures from the relevant ethical committees at the National  
6 Institute of Mental Health, National Center of Neurology and Psychiatry (number: A2013-054) and  
7 Tokai University (number: 14I-60), we obtained written informed consent in accordance with the  
8 Declaration of Helsinki from 30 sib pairs and their family members prior to collection of DNA  
9 samples. Among all subjects we selected 7 sib pairs corresponding to disease subtype through their  
10 lifetime for reduction of sample heterogeneity and elevation of likelihood of identification of  
11 susceptibility variants [8], though family P8 included a brother who displayed a different subtype  
12 (**Fig. 1 and Supplementary Table 1**). The IDs of the samples in this paper were reassigned for the  
13 experiment, therefore these IDs could not identify individuals. They are 15 individuals affected with  
14 EDs and 11 unaffected individuals, all of Japanese origin. They are also three ANR and three BN  
15 families, and one family displayed a diagnostic crossover from ANR to BN. Of the cases, each was  
16 diagnosed according to the DSM-IV criteria in Japan. DSM-IV eating disorder diagnosis was made  
17 by expert of psychosomatic doctors or psychiatrists expertized on eating disorders. DNA was  
18 extracted using a QIAamp DNA blood kit (QIAGEN, Hilden, Germany).

19

### 20 *2.2 Genomic library construction and sequencing*

21 For exon fragment capture and sequencing, an Agilent SureSelect Target Enrichment, v. 5 (50 Mbp),  
22 was used. Sequence analysis was performed using an Illumina Genome Analyzer IIX, HiSeq2000, or  
23 HiSeq2500 platform.

24

### 25 *2.3 Sequencing data analysis*

26 Reads that passed quality control were mapped to the reference genome (UCSC Genome Browser  
27 assembly GRCh37/hg19, <http://genome.ucsc.edu/>) with a Burrows-Wheeler Aligner, v. 0.5.9.

1 Potential PCR duplicates were flagged with Picard MarkDuplicates, v. 1.88  
2 (<http://picard.sourceforge.net/>). Genome Analysis Toolkit v. 2.2-8, was used to perform map quality  
3 score recalibration and variant detection. Single nucleotide variants (SNVs) and indels were then  
4 annotated for functional consequences at the gene using the ANNOVAR. Predictions of variants with  
5 risk were also performed using ANNOVAR, with non-synonymous variants (LJB, v. 3.0) employed  
6 for the effects on protein function (SIFT, PolyPhen, MutationTaster, Mutation Assesor, LRT,  
7 FATHMM) and evolutionary conservation (GERP++, phyloP, Siphy). Criteria used for deleterious  
8 variants in each prediction are shown following:  
9 SIFT (sift): D: deleterious, PolyPhen 2 HDIV: D: Probably damaging, LRT: D: Deleterious,  
10 MutationTaster: A (disease\_causing\_automatic) or D (disease\_causing), MutationAssessor: H: high  
11 FATHMM: D: deleterious, GERP++ >5, phyloP >2.0, SiPhy >15

12

### 13 *2.4 Confirmation of SNVs*

14 For PCR and sequencing (Greiner Bio-one) of the SNV of *CRHR2*, forward  
15 (CCTGGCAGGGGAGAAGAGC) and reverse (CCCCAAGCTGCCTCCTGACA) primers, and  
16 for the SNV of *GRM8*, forward (GCAACTCCAAGTCATCCATTTTCTTCA) and reverse  
17 (TGGAGCGAATTGCTCGGGATT) primers, were used. Sequencing reactions were carried out  
18 using a BigDye Terminator Cycle Sequencing kit, v. 3.1 (Thermo Fisher Scientific). Automated  
19 electrophoresis was performed with an ABI PRISM 3730 Genetic Analyzer (Thermo Fisher  
20 Scientific).

21

## 22 **3. Results**

23

### 24 *3.1 WES*

25 We obtained rare 4,032 SNVs, 113 splice site variants and 76 insertion/deletion variants (allele  
26 frequency <0.001) from a total of 633,030 variants (**Fig. 2**). Initially, we attempted to identify  
27 recessive and compound variants concordant with the affected sib-pairs, however none were found

1 among these rare variants. Next, heterozygote variants concordant with affected sib-pairs were  
2 extracted as dominant candidates. Finally, we estimated the most deleterious SNV in each family by  
3 use of six functional prediction (SIFT, PolyPhen, MutationTaster, Mutation Assessor, LRT,  
4 FATHMM) and three conservation-based (GERP++, phyloP, Siphy) methods [9].

5 A previous large exome sequencing study indicated a strong inverse relationship between average  
6 SNV age and number of methods needed to predict a variant as deleterious, thus SNVs predicted to  
7 be deleterious by multiple methods probably undergo a more intense purifying selection and are very  
8 rare in populations [10], suggesting them as candidates for disease pathogenesis. Moreover, most  
9 very-rare variants arose within the past 5–10,000 years and are population-specific [11]. Therefore,  
10 381 SNVs and 4 *de novo* SNVs were evaluated (**Fig. 2, Supplementary Table 2**) based on the  
11 number of methods that predicted a variant to be deleterious and a feature of the gene. Among those,  
12 only two were predicted to be deleterious by all nine methods, an SNV in corticotropin releasing  
13 hormone receptor 2 (*CRHR2*) noted in family P15 and an SNV in glutamate metabotropic receptor 8  
14 (*GRM8*) noted in family P4 (**Table 1 and Fig.1-2**). These were considered likely to be specific for a  
15 Japanese population, though a single allele for *CRHR2* was previously observed in Europeans (**Table**  
16 **1**). In addition, SNVs supported by eight of the methods were observed in the P7, P8, and P11  
17 families, while those supported by seven of the methods were observed in the P3 and P5 families.  
18 Among the 10 genes, *CRHR2*, *GRM8*, and glutamate ionotropic receptor  
19  $\alpha$ -amino-3-hydroxy-5-methyl-4-isoxazole propionic acid (AMPA) type subunit 2 (*GRIA2*) were  
20 indicated to have higher levels of expression in the brain and related tissues (**Table. 1**).

21

Table 1. Most deleterious variants in each family estimated by functional prediction

| Gene symbol    | Family | No. of methods <sup>a</sup> | Chr | Position <sup>b</sup> | Substitution     |            | SNV         | Frequency             |                                        | Gene description                                            | Gene expression <sup>f</sup> |
|----------------|--------|-----------------------------|-----|-----------------------|------------------|------------|-------------|-----------------------|----------------------------------------|-------------------------------------------------------------|------------------------------|
|                |        |                             |     |                       | Alt <sup>c</sup> | Amino acid |             | Japanese <sup>d</sup> | European <sup>e</sup><br>(non-Finnish) |                                                             |                              |
| <i>CRHR2</i>   | P15    | 9                           | 7   | 30702316              | T                | p.G231R    | rs569607645 | 0.000414              | 0.000009                               | Corticotropin-releasing hormone receptor 2                  | Pituitary, brain             |
| <i>GRM8</i>    | P4     | 9                           | 7   | 126409942             | C                | p.Y445C    | NA          | 0.000000              | 0.000000                               | Glutamate metabotropic receptor 8                           | Testis, brain                |
| <i>LGR4</i>    | P7     | 8                           | 11  | 27390603              | C                | p.N556S    | rs754383451 | 0.000000              | 0.000016                               | Leucine-rich repeat-containing G protein-coupled receptor 4 | Ovary, pancreas              |
| <i>MYH7B</i>   |        | 8                           | 20  | 33583163              | A                | p.E951K    | rs370896124 | 0.000535              | 0.000008                               | Myosin heavy chain 7B                                       | Heart, skeletal muscle       |
| <i>POC1B</i>   |        | 8                           | 12  | 89866042              | T                | p.D155N    | NA          | 0.000826              | 0.000000                               | POC1 centriolar protein homolog B                           | Heart, testis                |
| <i>ACADS</i>   | P8     | 8                           | 12  | 121176662             | T                | p.R325W    | rs121908006 | 0.000000              | 0.000026                               | Acyl-CoA dehydrogenase, C-2 to C-3 short chain              | Liver, skeletal muscle       |
| <i>ALAS1</i>   | P11    | 8                           | 3   | 52236598              | T                | p.P92L     | rs370171958 | 0.000826              | 0.000015                               | Aminolevulinate, delta-, synthase 1                         | Adrenal gland, brain         |
| <i>C3orf70</i> | P3     | 7                           | 3   | 184800841             | A                | p.S236L    | rs201783027 | 0.000413              | 0.000031                               | Chromosome 3 open reading frame 70                          | Colon, artery                |
| <i>NR1P1</i>   |        |                             | 21  | 16338385              | T                | p.R710H    | rs139218138 | 0.000000              | 0.000008                               | Nuclear receptor interacting protein 1                      | Cervix, adipose              |
| <i>GRIA2</i>   | P5     | 7                           | 4   | 158253975             | T                | p.T296I    | rs200845438 | 0.000400              | 0.000015                               | Glutamate receptor, ionotropic, AMPA 2                      | Brain, pituitary             |

- 1 Abbreviations: NA, not applicable, <sup>a</sup>Maximum number of methods for predicting variant as deleterious in each family, <sup>b</sup>Physical position in UCSC Genome Browser in Human Feb. 2009 Human GRCh37/hg19
- 2 Assembly, <sup>c</sup>Allele observed in this study, <sup>d</sup>Allele frequency in Japanese in Human Genetic Variation Database (<https://www.hgvd.genome.med.kyoto-u.ac.jp/>), <sup>e</sup>Allele frequency in European gnomAD (<https://gnomad.broadinstitute.org/>), <sup>f</sup>Top two tissues showing highest expression level in GTEx (release V8, 54 non-diseased tissue sites across nearly 1000 individuals).
- 3

1

2 *CRHR2* encodes a neuropeptide receptor for corticotropin-releasing factor (CRF), a critical  
3 coordinator of the hypothalamic-pituitary-adrenal axis [12] and for three urocortins (UCN1–UCN3)  
4 [13]. *CRHR2* is also a specific receptor for UCN2 and 3, which are associated with regulation of  
5 stress, anxiety, and food intake [14–17]. *GRM8* encodes a G-protein coupled metabotropic glutamate  
6 receptor that influences inhibition of the cyclic AMP cascade and regulates presynaptic glutamate  
7 release [18], and also has been found to have genetic associations with psychiatric phenotypes,  
8 including depression [19, 20] and eating behavior [18]. The two variants were also confirmed by  
9 Sanger sequencing (**Supplementary Figure 1**). Thus, it is considered that *CRHR2* and *GRM8* are  
10 potent candidate genes due to the pathogenesis of EDs in individuals included in this study.

11 *GRIA2* has a significant role in excitatory neurotransmission [21], and has been identified as a  
12 causative gene of intellectual disability and developmental epileptic encephalopathy. Therefore, we  
13 considered that *GRIA2* was a weaker candidate gene for EDs in this study, as the phenotypes  
14 generated by mutations may not be concordant with EDs. Furthermore, among the 381 SNVs  
15 considered to be candidates for dominant, all other SNVs were thought to be unlikely as causative  
16 factors of EDs after considering the descriptions and locations of expression (**Table 1**).

17 Four *de novo*, five splice site SNVs, and five insertion and deletion variants concordant with  
18 affected sib-pairs were identified as heterogeneous (**Supplementary Table 3 - 5**). However, in  
19 consideration of their features, these fourteen genes are unlikely to be causative factors of EDs.

20

### 21 *3.2 Evaluation of impact of SNVs on CRHR2 and GRM8*

22 *CRHR2* is classified as a secretin subfamily among class B G protein-coupled receptors (GPCRs). A  
23 GPCR features seven transmembrane helices (TM), three extracellular loops, and three intracellular  
24 loops. The rare SNV in family P15 (rs569607645) was found located within the TM4 region. Gly  
25 231, with a codon corresponding with the SNV conserved across species and among the class B  
26 GPCRs (**Fig. 3**), and located within a highly conserved sequence motif, GWGxP, in class B GPCRs  
27 [22]. Moreover, the substitution converts hydrophobic (glycine) into hydrophilic (arginine) amino



1 acid, implying that this SNV influences conformation and function of CRHR2.

2 Metabotropic glutamate (mGlu) receptors are members of the class C family of GPCRs that  
3 modulate cellular responses to the excitatory neurotransmitter L-glutamic acid (L-Glu) in many  
4 synapses in the CNS [23]. The amino terminal domain (ATD) of mGlu receptors contains an  
5 orthosteric glutamate recognition site, which is highly conserved across the eight mGlu receptor  
6 subtypes [24]. The rare SNV in family P4 was located within an  $\alpha$ -helix structure of the ATD region.  
7 Tyrosine 441, with a codon corresponding with the SNV, was found to be conserved across species  
8 and hydrogen bonds to Asp 422 in an adjacent  $\alpha$ -helix structure (**Supplementary Figure 2**) [23].  
9 Therefore, the substitution of tryptophan to cysteine is likely to cancel the hydrogen bond. We also  
10 evaluated the effect of the SNV on protein stability using X-ray crystal structure data (PDB ID  
11 6BSZ) and ENCoM, which are used to predict the effect of mutations on thermostability and  
12 dynamics, as well as to generate geometrically realistic conformational ensembles [25]. Those  
13 results indicated that the conformation of GRM8 was expected to be destabilized (-0.822 kcal/mol).  
14 Thus, the substitution may have an impact on the structure and functions of GRM8.

15

## 16 **4. Discussion**

### 17 *4.1 CRHR2*

18 Common SNVs in *CRHR2* were not detected in a large genome-wide association study for anorexia  
19 nervosa and other psychiatric disorders [4]. On the other hand, WES with bipolar disorder families  
20 identified a rare and functionally relevant nonsense variant within the intracellular C-terminal region  
21 of *CRHR2* [26]. Thus, it is suggested that a rare SNV in *CRHR2* contributes to the pathogenesis of a  
22 psychiatric disorder.

23 A study that used *Crhr2* knockout mice demonstrated that CRHR2 is essential for sustained  
24 feeding suppression induced by UCNs, members of the CRF family of peptides [27]. In another  
25 investigation, *Crhr2*-mutant mice showed decreased food intake following food deprivation [12].  
26 Therefore, UCNs are potent for suppression of food intake by CRHR2-specific mediation [28].  
27 Furthermore, *Crhr2*-mutant mice were also reported to have an anxiogenic phenotype and impaired

1 stress recovery [13]. These observations are related to serotonergic neurons. Serotonin (5-HT) is  
2 produced by serotonergic neurons of the dorsal raphe nucleus (DRN) located within the brain stem  
3 and regulates feeding behavior [29], while CRHR2 is specifically expressed in the DRN  
4 serotonergic neuron of [30] and plays important roles in controlling serotonergic neuronal activity  
5 [31]. Hammack et al. performed experiments within the rat DRN using UCN2, an agonist for the  
6 highly selective CRHR2, as well as an antagonist for that and demonstrated that CRHR2 in the DRN  
7 mediates behavioral consequences of uncontrollable stress [32]. Additionally, anxiety-related stimuli  
8 by UCN2 were shown to lead to increased activation of serotonergic neurons within the DRN [33].  
9 The DRN projects to the bed nucleus of the stria terminalis, which plays essential roles in threat  
10 processing, and is responsible for such emotional states as fear and anxiety [34, 35]. The tone of the  
11 DRN–5-HT system is regulated in a dynamic manner through CRHR2 activation, and either  
12 decreased or increased depending on the level of endogenous or exogenous ligands [36]. Indeed, in  
13 malnourished individuals suffering from AN the cerebrospinal fluid has reduced amounts of  
14 5-hydroxyindoleacetic acid which is the major brain metabolite of 5-HT and is thought to reflect  
15 extracellular 5-HT concentrations, indicating that abnormal activity of 5-HT system is related to EDs  
16 pathogenesis. [37]. Thus, CRHR2 mediates not only food intake, but also passive coping behavior  
17 and depression-like responses triggered by uncontrollable stress [13] via the serotonergic neuron in  
18 the DRN.

19 Structural analysis demonstrated that the motif included with rs569607645 is a  
20 cholesterol-binding site, and that artificial mutations in that site reduce the activation potency of  
21 UCN1 and CRF to CRHR2, suggesting that the site plays a role in stabilizing peptide binding [38].  
22 Moreover, bound cholesterol in the structure of CRHR2 contribute to GPCR signaling, indicating  
23 that the GPCR signalosome carries out its function in the cholesterol-rich lipid raft [38]. Thus, the  
24 substitution of G231R provided by the rare SNV rs569607645 impairs the functions of CRHR2,  
25 which may decrease the coping mechanism in response to stress [13] and/or feed suppression [28] in  
26 patients with EDs.

27 ED patients have higher rates of anxiety disorders as compared with normal individuals,

1 suggesting that both disorders might share common etiological factors, which can increase the  
2 susceptibility of an individual to either [39]. Stress is prominently involved in the pathogenesis and  
3 development of EDs and anxiety disorders. Moreover, coping mechanisms such as a positive attitude,  
4 planning, and social support seem to be impaired in ED patients who often do not cope well with  
5 emotional distress, implicating that such mechanisms may be disrupted [40]. Therefore, a decay of  
6 CRHR2 functions may play a part in the pathogenesis of EDs.

7

#### 8 4.2 *GRM8*

9 As mentioned above, associations between psychiatric disorders and *GRM8* has been indicated  
10 with strong evidence in previous reports. On the other hand, a sequencing study for bipolar disorder  
11 identified enrichment of damaging mutations in GPCRs including *CRHR2* and the *GRM* gene family,  
12 with increased numbers of deleterious variants [26].

13 The mGluRs modulate glutamatergic neurotransmission, and are considered to also have effects  
14 on dopaminergic and adrenergic neurotransmission, implicating their involvement in a number of  
15 neurological disorders [41]. An expression study using animals indicated that *GRM8* may play a role  
16 in feeding behavior and metabolism via the hypothalamic pathway [18, 42].

17

### 18 **5 Conclusions**

19 We found two rare SNVs as candidates for predisposition to EDs in affected sib-pair families. One  
20 found located on *CRHR2* plays important roles in the serotonergic system in the DRN, and is  
21 involved with feeding and stress-coping behavior, while the other SNV is located on *GRM8*, which  
22 modulates cellular responses to the excitatory neurotransmitter in the CNS, and may play a role in  
23 feeding behavior and metabolism via the hypothalamic pathway. Moreover, the present findings  
24 indicated potential for both non-synonymous SNVs to have impact on conformation and functions of  
25 molecules. However, this study only observed the deleterious SNVs in one family for each gene and  
26 was not able to indicate that the SNVs explained how much of the genetic variance of EDs.  
27 Furthermore, it is impossible to rule out all candidate variants. Therefore, these genes must be

1 confirmed by genetic analysis for additional families and sporadic cases and by functional analysis  
2 in the future investigations.

3

#### 4 **Data accessibility**

5 Data obtained in this study are available from the authors upon reasonable request.

6

#### 7 **Author contributions**

8 AO conceived the studies, performed experiments, contributed to the data analysis, and drafted the  
9 manuscript. SH, MU and SN were contributed to the data analysis. GK and TA were involved in  
10 sample collection, editing the manuscript.

11

#### 12 **Funding**

13 This work was supported by JSPS KAKENHI (16K09275 and 23390191).

14

#### 15 **References**

16

17 [1] C.M. Bulik, L.M. Thornton, T.L. Root, et al., Understanding the relation between anorexia nervosa  
18 and bulimia nervosa in a Swedish national twin sample, *Biol Psychiatry*, 67 (2010) 71-77.

19 [2] M. Strober, R. Freeman, C. Lampert, et al., Controlled family study of anorexia nervosa and bulimia  
20 nervosa: evidence of shared liability and transmission of partial syndromes, *The American journal of*  
21 *psychiatry*, 157 (2000) 393-401.

22 [3] H. Cui, J. Moore, S.S. Ashimi, et al., Eating disorder predisposition is associated with ESRRA and  
23 HDAC4 mutations, *The Journal of clinical investigation*, 123 (2013) 4706-4713.

24 [4] H.J. Watson, Z. Yilmaz, L.M. Thornton, et al., Genome-wide association study identifies eight risk  
25 loci and implicates metabo-psychiatric origins for anorexia nervosa, *Nature genetics*, 51 (2019)  
26 1207-1214.

27 [5] H. Cui, Y. Lu, M.Z. Khan, et al., Behavioral disturbances in estrogen-related receptor alpha-null mice,  
28 *Cell reports*, 11 (2015) 344-350.

29 [6] M. Lutter, M.Z. Khan, K. Satio, et al., The Eating-Disorder Associated HDAC4(A778T) Mutation  
30 Alters Feeding Behaviors in Female Mice, *Biol Psychiatry*, 81 (2017) 770-777.

31 [7] K.C. Davis, K. Saito, S.R. Rodeghiero, et al., Behavioral Alterations in Mice Carrying Homozygous

- 1 HDAC4 (A778T) Missense Mutation Associated With Eating Disorder, *Frontiers in neuroscience*, 14  
2 (2020) 139.
- 3 [8] D.E. Grice, K.A. Halmi, M.M. Fichter, et al., Evidence for a susceptibility gene for anorexia nervosa  
4 on chromosome 1, *Am J Hum Genet*, 70 (2002) 787-792.
- 5 [9] X. Liu, X. Jian, E. Boerwinkle, dbNSFP v2.0: a database of human non-synonymous SNVs and their  
6 functional predictions and annotations, *Human mutation*, 34 (2013) E2393-2402.
- 7 [10] W. Fu, T.D. O'Connor, G. Jun, et al., Analysis of 6,515 exomes reveals the recent origin of most  
8 human protein-coding variants, *Nature*, 493 (2013) 216-220.
- 9 [11] M. Nagasaki, J. Yasuda, F. Katsuoka, et al., Rare variant discovery by deep whole-genome  
10 sequencing of 1,070 Japanese individuals, *Nature communications*, 6 (2015) 8018.
- 11 [12] T.L. Bale, A. Contarino, G.W. Smith, et al., Mice deficient for corticotropin-releasing hormone  
12 receptor-2 display anxiety-like behaviour and are hypersensitive to stress, *Nature genetics*, 24 (2000)  
13 410-414.
- 14 [13] M.J. Henckens, J.M. Deussing, A. Chen, Region-specific roles of the corticotropin-releasing  
15 factor-urocortin system in stress, *Nature reviews. Neuroscience*, 17 (2016) 636-651.
- 16 [14] C. Yeh, C.H. Ting, M.L. Doong, et al., Intracerebroventricular urocortin 3 counteracts central acyl  
17 ghrelin-induced hyperphagic and gastroprokinetic effects via CRF receptor 2 in rats, *Drug design,  
18 development and therapy*, 10 (2016) 3281-3290.
- 19 [15] P. Cottone, V. Sabino, T.R. Nagy, et al., Centrally administered urocortin 2 decreases gorging on  
20 high-fat diet in both diet-induced obesity-prone and -resistant rats, *International journal of obesity* (2005),  
21 37 (2013) 1515-1523.
- 22 [16] T.M. Reyes, K. Lewis, M.H. Perrin, et al., Urocortin II: a member of the corticotropin-releasing  
23 factor (CRF) neuropeptide family that is selectively bound by type 2 CRF receptors, *Proceedings of the  
24 National Academy of Sciences of the United States of America*, 98 (2001) 2843-2848.
- 25 [17] K. Lewis, C. Li, M.H. Perrin, et al., Identification of urocortin III, an additional member of the  
26 corticotropin-releasing factor (CRF) family with high affinity for the CRF2 receptor, *Proceedings of the  
27 National Academy of Sciences of the United States of America*, 98 (2001) 7570-7575.
- 28 [18] M.T. Gast, A. Tonjes, M. Keller, et al., The role of rs2237781 within GRM8 in eating behavior, *Brain  
29 Behav*, 3 (2013) 495-502.
- 30 [19] A. Terracciano, T. Tanaka, A.R. Sutin, et al., Genome-wide association scan of trait depression, *Biol  
31 Psychiatry*, 68 (2010) 811-817.
- 32 [20] W. Li, K. Ju, Z. Li, et al., Significant association of GRM7 and GRM8 genes with schizophrenia and  
33 major depressive disorder in the Han Chinese population, *Eur Neuropsychopharmacol*, 26 (2016)  
34 136-146.
- 35 [21] D. Capauto, A. Colantoni, L. Lu, et al., A Regulatory Circuitry Between Gria2, miR-409, and  
36 miR-495 Is Affected by ALS FUS Mutation in ESC-Derived Motor Neurons, *Molecular neurobiology*, 55  
37 (2018) 7635-7651.

- 1 [22] K. Hollenstein, J. Kean, A. Bortolato, et al., Structure of class B GPCR corticotropin-releasing factor  
2 receptor 1, *Nature*, 499 (2013) 438-443.
- 3 [23] Q. Chen, J.D. Ho, S. Ashok, et al., Structural Basis for (S)-3,4-Dicarboxyphenylglycine (DCPG) As  
4 a Potent and Subtype Selective Agonist of the mGlu(8) Receptor, *Journal of medicinal chemistry*, 61  
5 (2018) 10040-10052.
- 6 [24] J. Hao, Q. Chen, Insights into the Structural Aspects of the mGlu Receptor Orthosteric Binding Site,  
7 *Current topics in medicinal chemistry*, 19 (2019) 2421-2446.
- 8 [25] V. Frappier, M. Chartier, R.J. Najmanovich, ENCoM server: exploring protein conformational space  
9 and the effect of mutations on protein function and stability, *Nucleic acids research*, 43 (2015) W395-400.
- 10 [26] C. Cruceanu, J.F. Schmouth, S.G. Torres-Platas, et al., Rare susceptibility variants for bipolar  
11 disorder suggest a role for G protein-coupled receptors, *Mol Psychiatry*, 23 (2018) 2050-2056.
- 12 [27] S.C. Coste, R.A. Kesterson, K.A. Heldwein, et al., Abnormal adaptations to stress and impaired  
13 cardiovascular function in mice lacking corticotropin-releasing hormone receptor-2, *Nature genetics*, 24  
14 (2000) 403-409.
- 15 [28] W. Pan, A.J. Kastin, Urocortin and the brain, *Progress in neurobiology*, 84 (2008) 148-156.
- 16 [29] C.P. Magalhães, M.F. de Freitas, M.I. Nogueira, et al., Modulatory role of serotonin on feeding  
17 behavior, *Nutritional neuroscience*, 13 (2010) 246-255.
- 18 [30] J. Ren, A. Isakova, D. Friedmann, et al., Single-cell transcriptomes and whole-brain projections of  
19 serotonin neurons in the mouse dorsal and median raphe nuclei, *eLife*, 8 (2019).
- 20 [31] M.W. Lieb, M. Weidner, M.R. Arnold, et al., Effects of maternal separation on serotonergic systems  
21 in the dorsal and median raphe nuclei of adult male Tph2-deficient mice, *Behavioural brain research*, 373  
22 (2019) 112086.
- 23 [32] S.E. Hammack, M.J. Schmid, M.L. LoPresti, et al., Corticotropin releasing hormone type 2 receptors  
24 in the dorsal raphe nucleus mediate the behavioral consequences of uncontrollable stress, *The Journal of  
25 neuroscience : the official journal of the Society for Neuroscience*, 23 (2003) 1019-1025.
- 26 [33] J.H. Fox, C.A. Lowry, Corticotropin-releasing factor-related peptides, serotonergic systems, and  
27 emotional behavior, *Frontiers in neuroscience*, 7 (2013) 169.
- 28 [34] S. Ueda, M. Hosokawa, K. Arikawa, et al., Distinctive Regulation of Emotional Behaviors and  
29 Fear-Related Gene Expression Responses in Two Extended Amygdala Subnuclei With Similar Molecular  
30 Profiles, *Frontiers in molecular neuroscience*, 14 (2021) 741895.
- 31 [35] C.A. Marcinkiewicz, G. Bierlein-De La Rosa, C.E. Dorrier, et al., Sex-Dependent Modulation of  
32 Anxiety and Fear by 5-HT(1A) Receptors in the Bed Nucleus of the Stria Terminalis, *ACS chemical  
33 neuroscience*, 10 (2019) 3154-3166.
- 34 [36] L. Pernar, A.L. Curtis, W.W. Vale, et al., Selective activation of corticotropin-releasing factor-2  
35 receptors on neurochemically identified neurons in the rat dorsal raphe nucleus reveals dual actions, *The  
36 Journal of neuroscience : the official journal of the Society for Neuroscience*, 24 (2004) 1305-1311.
- 37 [37] W.H. Kaye, J.L. Fudge, M. Paulus, New insights into symptoms and neurocircuit function of

- 1 anorexia nervosa, Nature reviews. Neuroscience, 10 (2009) 573-584.
- 2 [38] S. Ma, Q. Shen, L.H. Zhao, et al., Molecular Basis for Hormone Recognition and Activation of  
3 Corticotropin-Releasing Factor Receptors, Molecular cell, 77 (2020) 669-680.e664.
- 4 [39] E. Pallister, G. Waller, Anxiety in the eating disorders: understanding the overlap, Clinical  
5 psychology review, 28 (2008) 366-386.
- 6 [40] N.T. Burkert, K. Koschutnig, F. Ebner, et al., Structural hippocampal alterations, perceived stress,  
7 and coping deficiencies in patients with anorexia nervosa, The International journal of eating disorders,  
8 48 (2015) 670-676.
- 9 [41] J.-Q. Wang, A.-L. Brownell, Development of Metabotropic Glutamate Receptor Ligands for  
10 Neuroimaging, Current Medical Imaging Reviews, 3 (2007) 186-205.
- 11 [42] S.E. Higgins, L.E. Ellestad, N. Trakooljul, et al., Transcriptional and pathway analysis in the  
12 hypothalamus of newly hatched chicks during fasting and delayed feeding, BMC genomics, 11 (2010)  
13 162.

14

## 15 **FIGURE LEGENDS**

16

17 **FIGURE 1** Sib-pair families affected by EDs were examined using whole exome sequencing.  
18 Individuals labeled with an ID number were sequenced. The disease phenotype of affected sib-pairs  
19 in the P15 family was transferred from ANR to BN. The rare variants *GRM8* and *CRHR2* were  
20 observed in the P4 and P15 families, respectively.

21 Abbreviations: ANR, anorexia nervosa restricting type BN, bulimia nervosa

22

23 **FIGURE 2** Scheme for screening variants with whole exome sequencing.

24

25

26 **FIGURE 3** Multiple amino acid sequence alignments of TM4 helix of human class B GPCRs and  
27 *CRHR2* in various species. Upper alignment indicates TM4 of a selected set of human class B  
28 GPCRs included with the GWG x P motif involved in cholesterol binding. Lower alignment  
29 indicates evolutionarily conserved amino acids. The level of blue shading is shown according to  
30 sequence conservation. Black square indicates amino acid position corresponding to human G231.

31





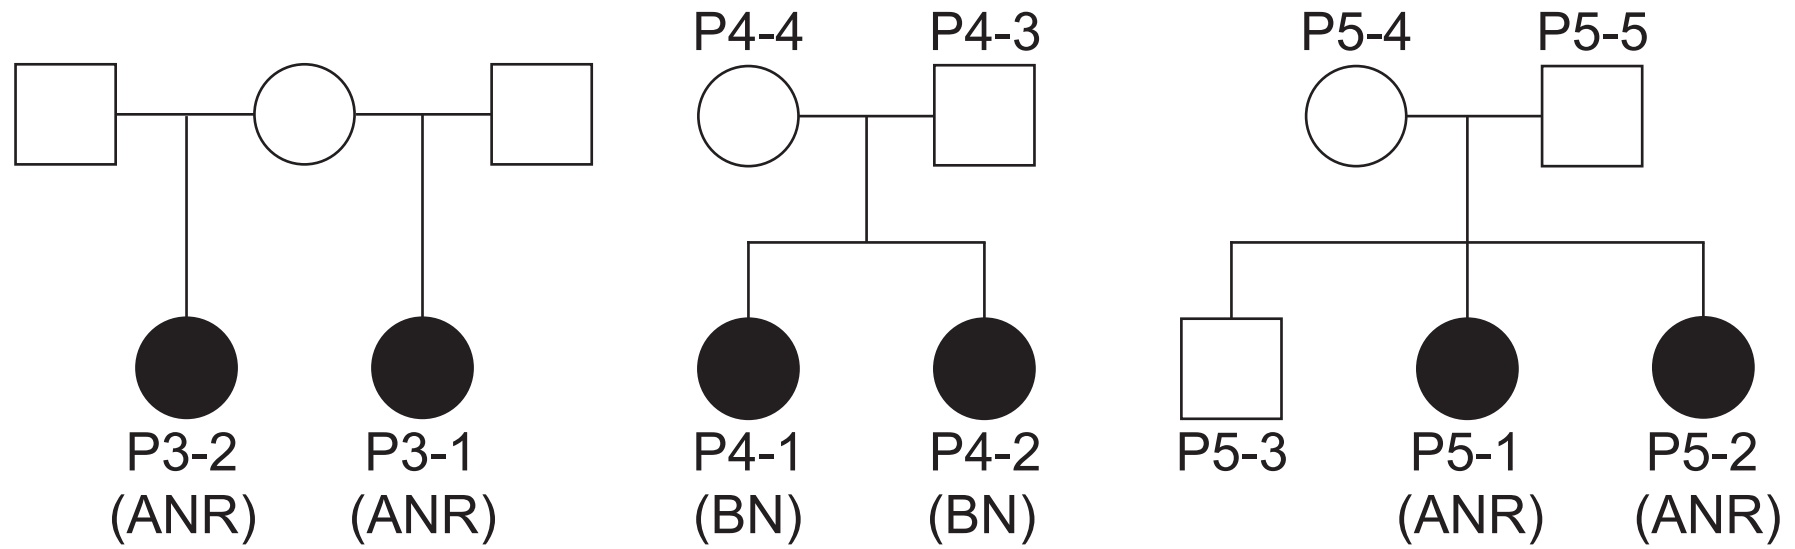

*GRM8*

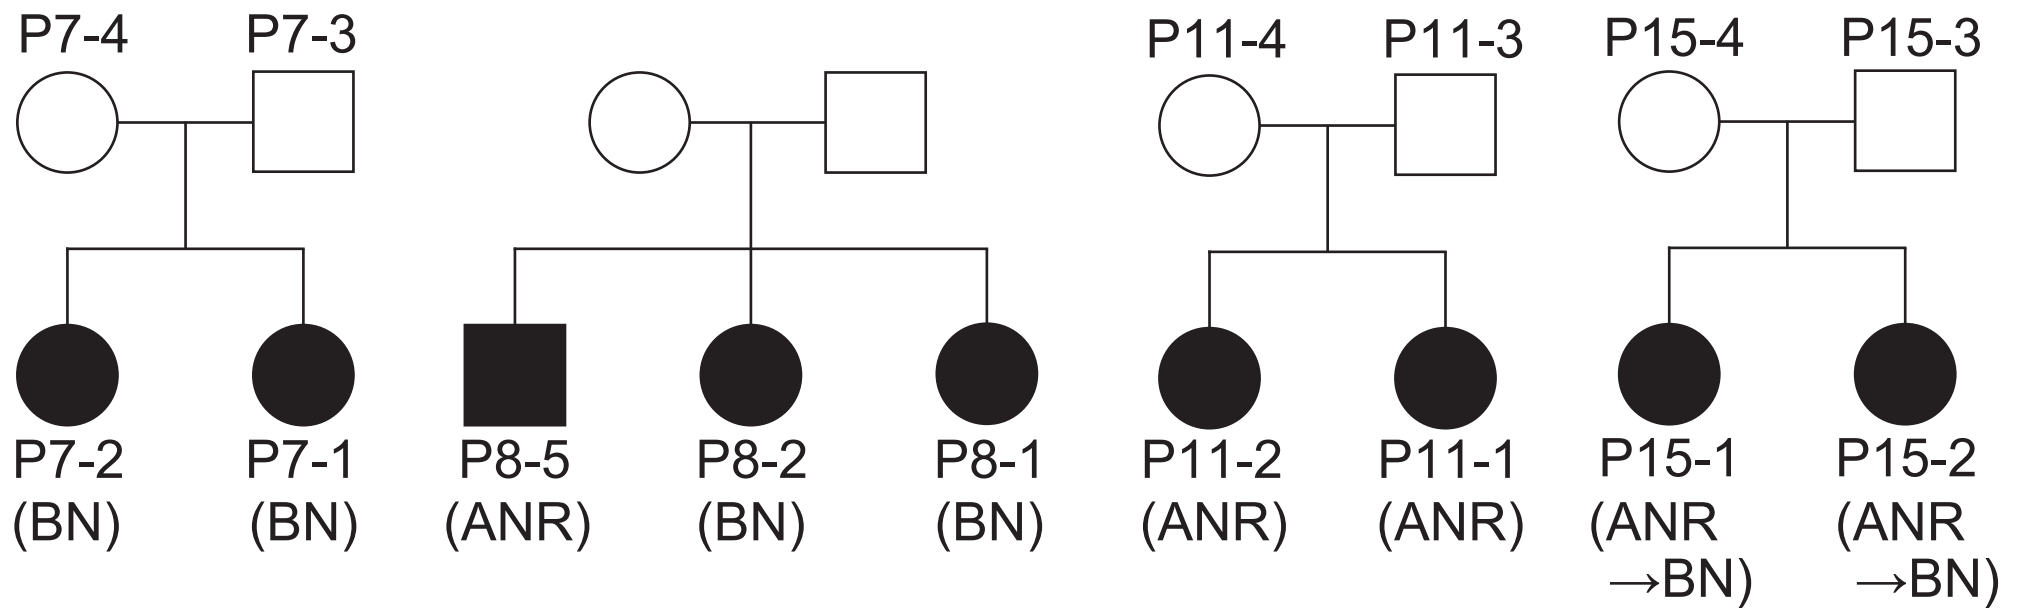

*CRHR2*

Figure 1

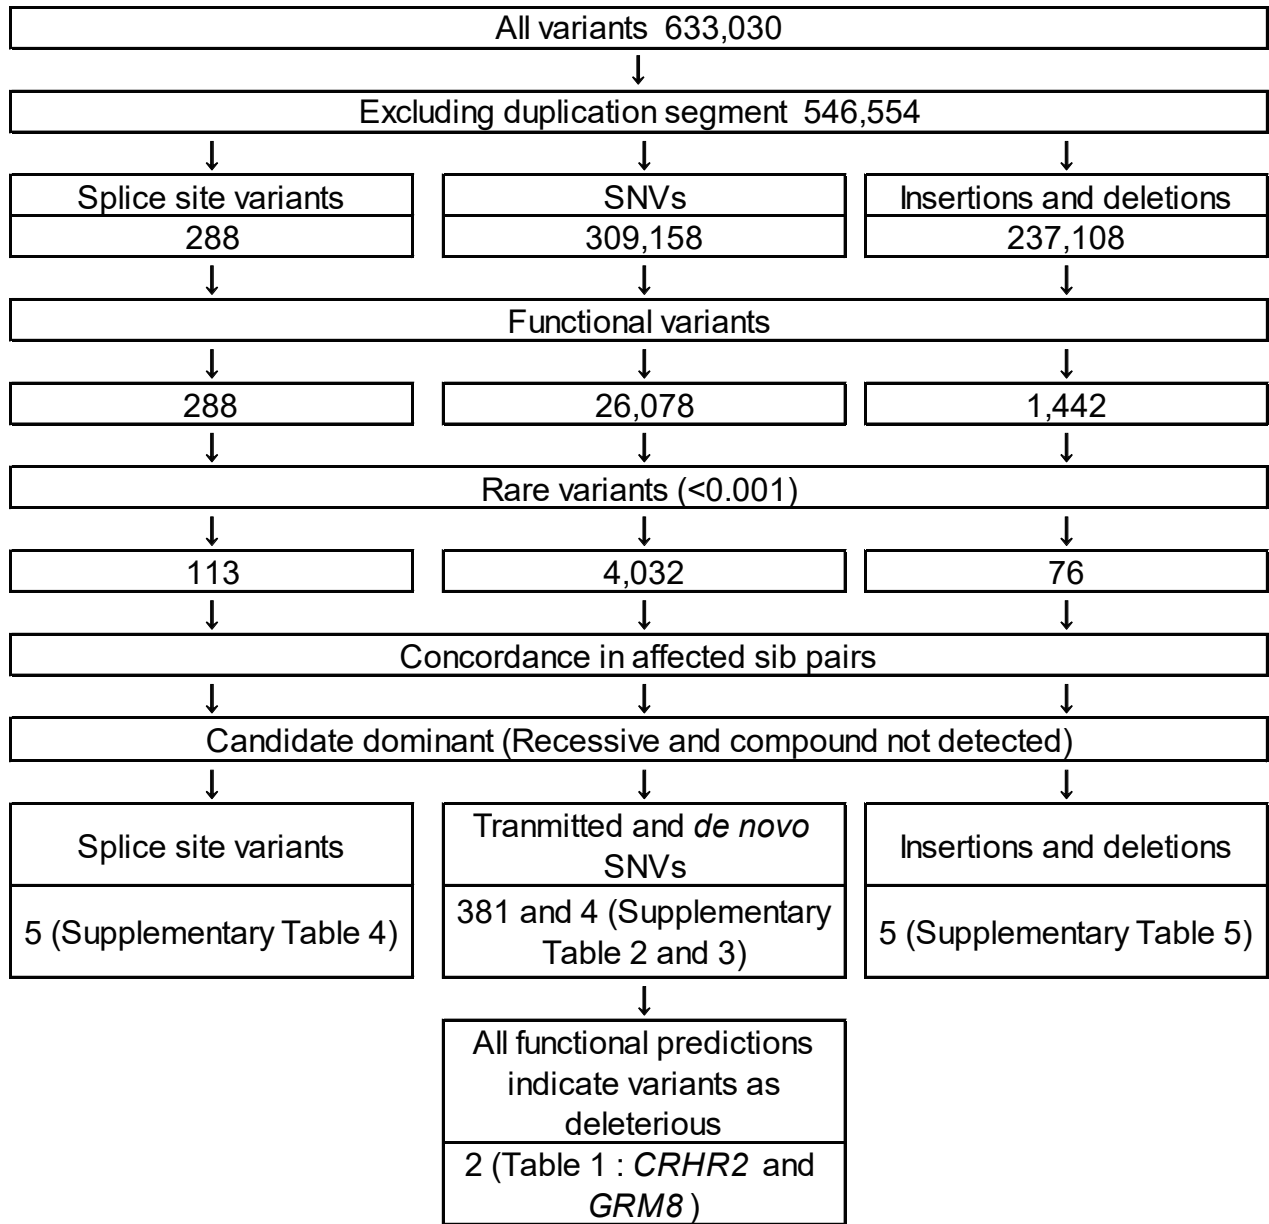

Figure 2

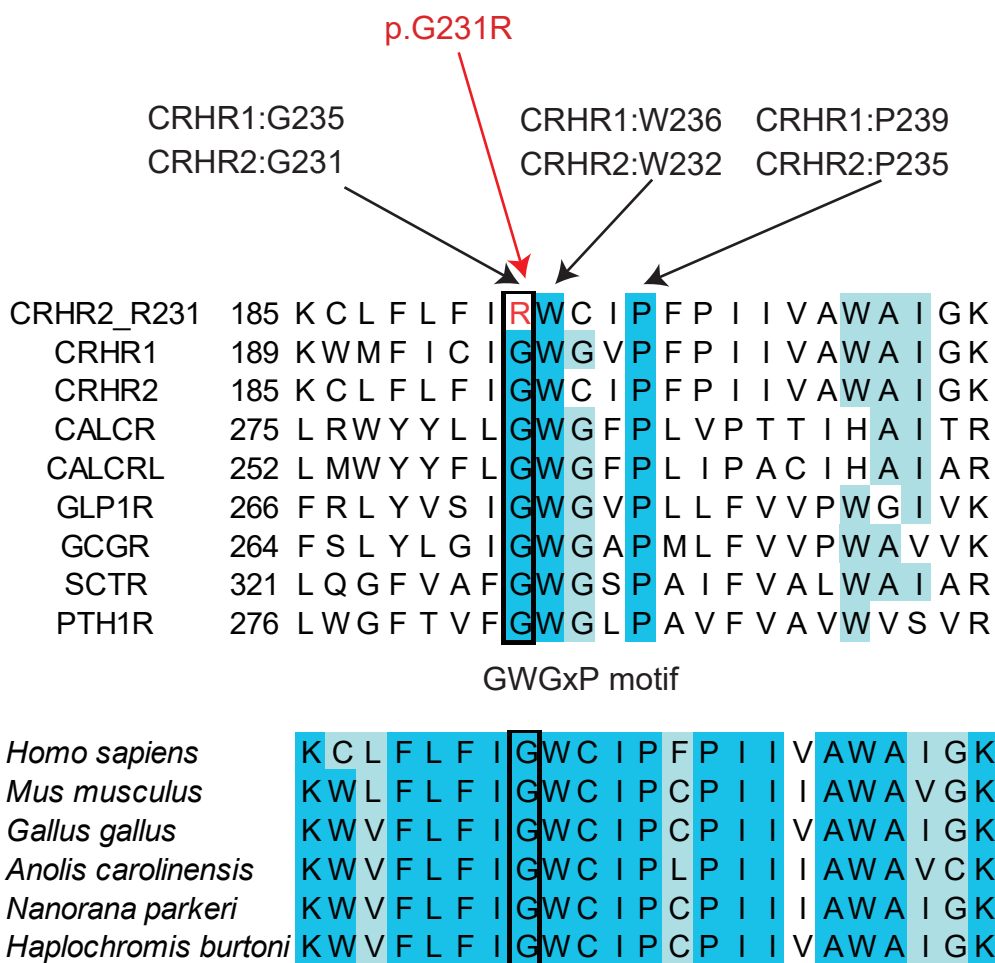

Figure 3

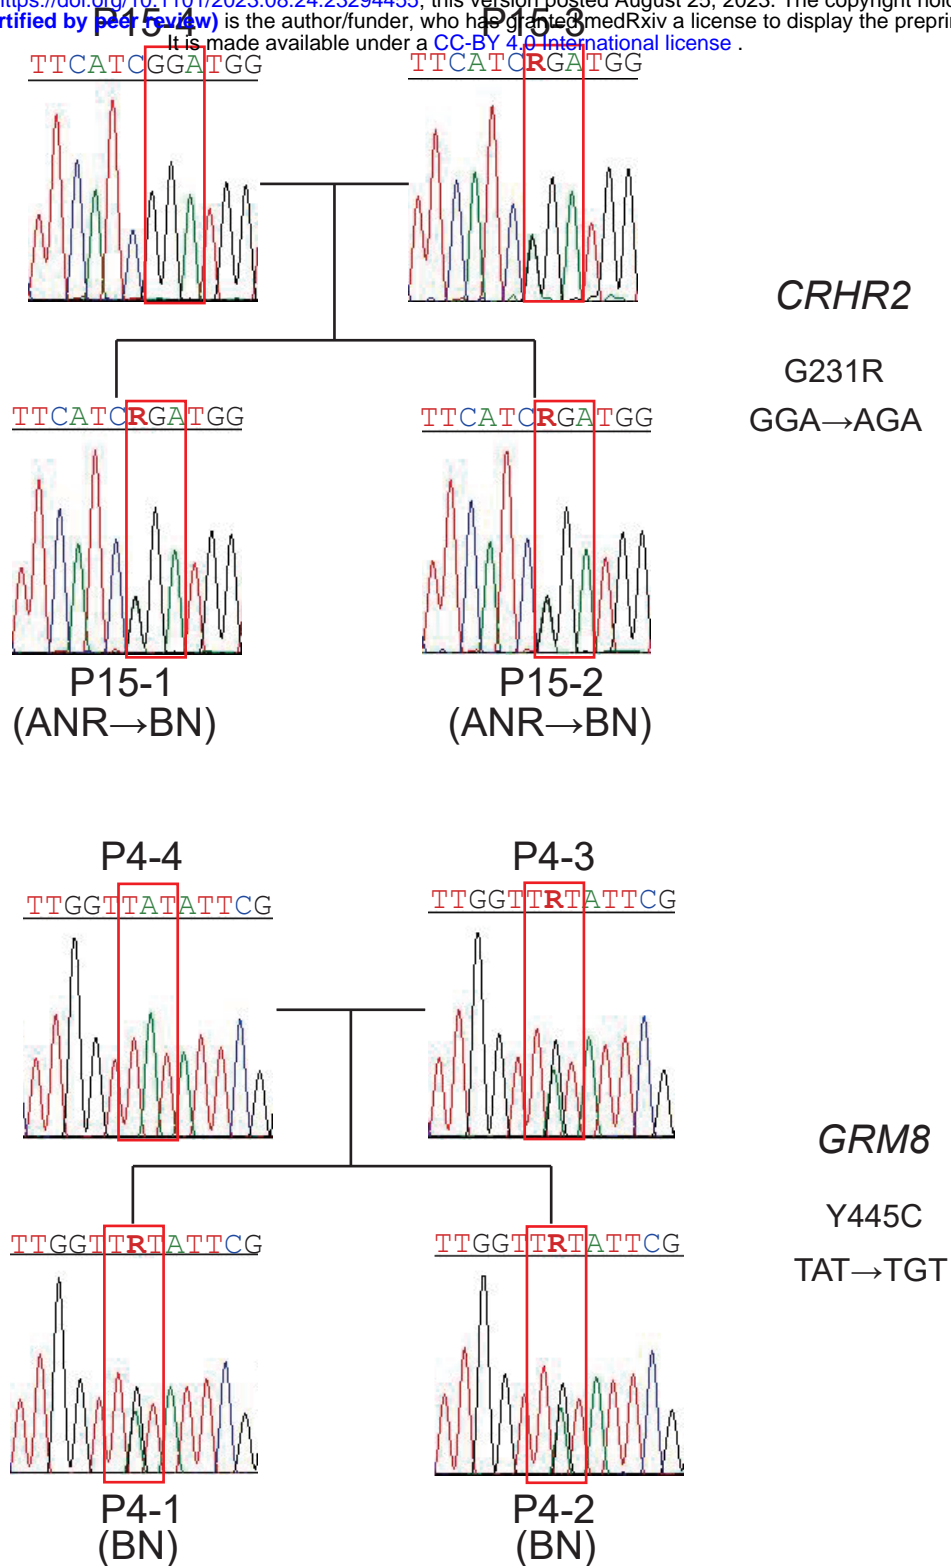

Supplementary Figure 1

Confirmation by Sanger sequencing for SNVs. Red squares indicate codons providing amino acid substitutions. Upper panel shows SNV of CRHR2 in P15 family. Lower panel shows SNV of GRM8 in P4 family.

medRxiv preprint doi: <https://doi.org/10.1101/2023.08.24.23294455>; this version posted August 25, 2023. The copyright holder for this preprint (which was not certified by peer review) is the author/funder, who has granted medRxiv a license to display the preprint in perpetuity. It is made available under aCC-BY 4.0 International license.

|                             |                                               |
|-----------------------------|-----------------------------------------------|
| <i>Homo sapiens</i>         | S T I D G K E L L G Y I R A V N F N G S A G T |
| <i>Mus musculus</i>         | V T I D G K E L L S Y I R A V N F N G S A G T |
| <i>Gallus gallus</i>        | D G K E L L R A V N F N G S A G T             |
| <i>Anolis carolinensis</i>  | A T I D G K E L L S Y I R A V N F N G S A G T |
| <i>Nanorana parkeri</i>     | K T I D G K E L L S Y I R A V N F N G S A G T |
| <i>Haplochromis burtoni</i> | A N I D G K E L L N H I R A V N F N G S A G T |

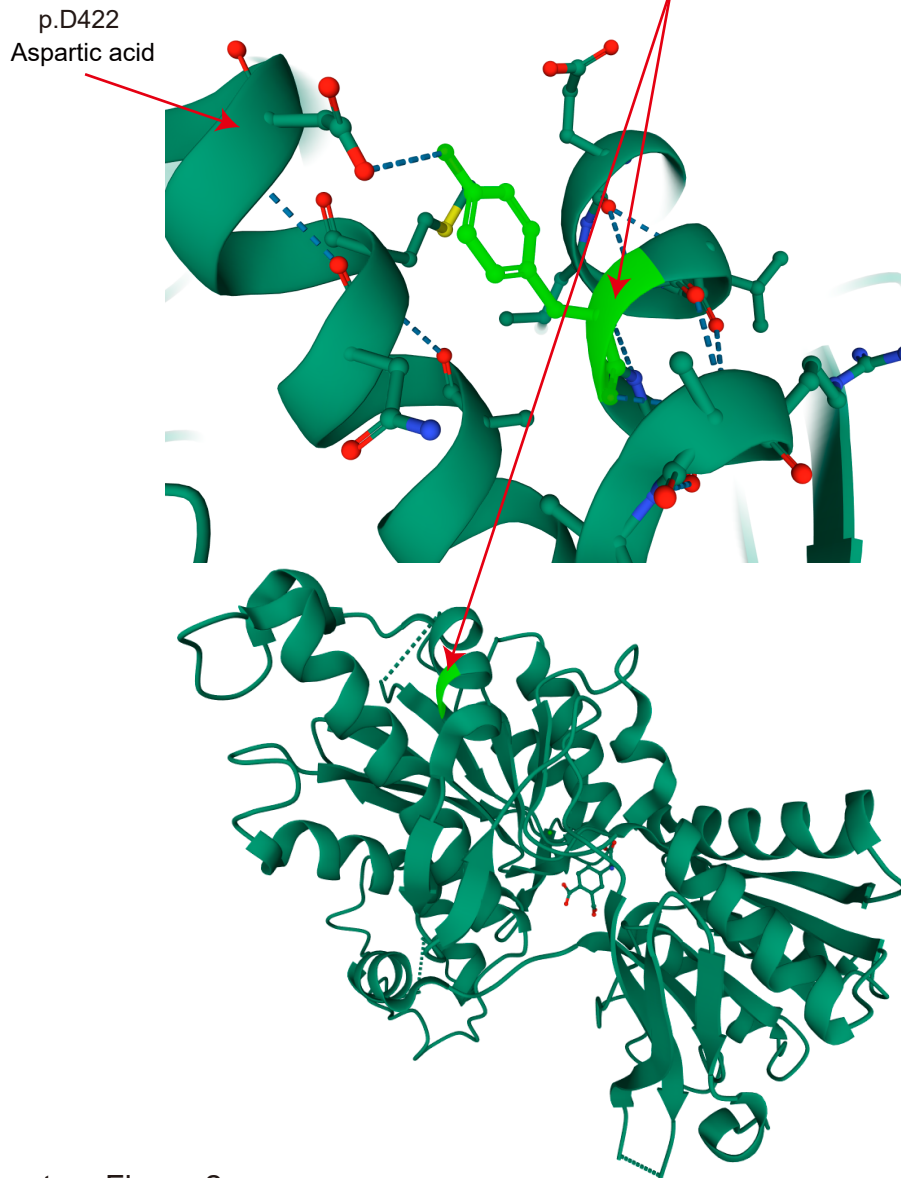

### Supplementary Figure 2

Multiple amino acid sequence alignment of GRM8 showing evolutionarily conserved amino acids and ATD structure of GRM8. Upper alignment indicates evolutionarily conserved amino acids. Black square indicates amino acid position corresponding to human Y445. Middle panel indicates ribbon diagram around Y445 (light green). Hydrogen bonds are depicted as blue dotted lines. Lower panel indicates ribbon representation for all ATDs including Y445 (light green). These ribbon diagram images were created using Mol\* Viewer [1] with the PROTEIN DATA BANK (<https://www.rcsb.org/>) for PDB ID 6BSZ [2].

- [1] D. Sehnal, S. Bittrich, M. Deshpande, et al., Mol\* Viewer: modern web app for 3D visualization and analysis of large biomolecular structures, *Nucleic acids research*, 49 (2021) W431-w437.
- [2] Q. Chen, J.D. Ho, S. Ashok, et al., Structural Basis for (S)-3,4-Dicarboxyphenylglycine (DCPG) As a Potent and Subtype Selective Agonist of the mGlu(8) Receptor, *Journal of medicinal chemistry*, 61 (2018) 10040-10052.

Supplementary Table 1: Clinical features of affected sib pairs in this study.

| Family ID | Individual ID | Gender | Subtype through lifetime | Height (cm) | Weight (kg) |      |
|-----------|---------------|--------|--------------------------|-------------|-------------|------|
|           |               |        |                          |             | Min.        | Max. |
| P3        | P3-1          | F      | ANR                      | 158         | NA          | NA   |
|           | P3-2          | F      | ANR                      | 151         | NA          | NA   |
| P4        | P4-1          | F      | BN                       | 156         | NA          | NA   |
|           | P4-2          | F      | BN                       | 161         | NA          | NA   |
| P5        | P5-1          | F      | ANR                      | 156         | 28          | NA   |
|           | P5-2          | F      | ANR                      | 167         | 44          | 58   |
| P7        | P7-1          | F      | BN                       | 162         | NA          | NA   |
|           | P7-2          | F      | BN                       | 158         | 43          | 60   |
| P8        | P8-1          | F      | BN                       | 152         | NA          | NA   |
|           | P8-2          | F      | BN                       | 160         | 39          | 53   |
|           | P8-3          | M      | ANR                      | 169         | 42          | 53   |
| P11       | P11-1         | F      | ANR                      | 162         | 26          | 64   |
|           | P11-2         | F      | ANR                      | 168         | 33          | 52   |
| P15       | P15-1         | F      | ANR→BN                   | 162         | 33          | 57   |
|           | P15-2         | F      | ANR→BN                   | 168         | 40          | 47   |

| Gene symbol | Chr | Position <sup>a</sup> | Ref | Alt | cDNA      | Amino acid | Exon   | Transcript ID | SNV         | Frequency <sup>d</sup> | No. of methods <sup>e</sup> |
|-------------|-----|-----------------------|-----|-----|-----------|------------|--------|---------------|-------------|------------------------|-----------------------------|
| FAM213B     | 1   | 2518564               | C   | T   | c.C188T   | p.A63V     | exon2  | NM_001195736  | NA          | 0.000000               | 2                           |
| PRDM16      | 1   | 3342747               | C   | A   | c.C3242A  | p.A1081D   | exon14 | NM_022114     | NA          | 0.000000               | 5                           |
| MEGF6       | 1   | 3407118               | G   | A   | c.C4600T  | p.R1534W   | exon37 | NM_001409     | NA          | 0.000000               | 2                           |
| DFFB        | 1   | 3784601               | G   | A   | c.G566A   | p.R189Q    | exon4  | NM_001282669  | rs201973418 | 0.000415               | 7                           |
| C1orf167    | 1   | 11835556              | C   | T   | c.C2053T  | p.R685C    | exon9  | NM_001010881  | rs41275456  | 0.000000               | 0                           |
| C1orf167    | 1   | 11838841              | A   | G   | c.A2464G  | p.S822G    | exon11 | NM_001010881  | rs56001051  | 0.000000               | 0                           |
| C1orf167    | 1   | 11839034              | G   | A   | c.G2548A  | p.A850T    | exon12 | NM_001010881  | rs55967531  | 0.000000               | 0                           |
| C1orf167    | 1   | 11845222              | T   | C   | c.T3443C  | p.V1148A   | exon16 | NM_001010881  | rs55867221  | 0.000000               | 0                           |
| C1orf167    | 1   | 11847449              | G   | A   | c.G3572A  | p.R1191H   | exon17 | NM_001010881  | rs3737967   | 0.000000               | 0                           |
| C1orf167    | 1   | 11848068              | G   | C   | c.G3812C  | p.C1271S   | exon18 | NM_001010881  | rs1537514   | 0.000000               | 0                           |
| VPS13D      | 1   | 12309316              | G   | A   | c.G484A   | p.G162S    | exon6  | NM_015378     | NA          | 0.000000               | 2                           |
| PADI1       | 1   | 17559348              | C   | T   | c.C1196T  | p.P399L    | exon11 | NM_013358     | NA          | 0.000000               | 0                           |
| ALPL        | 1   | 21904130              | G   | A   | c.G1333A  | p.V445I    | exon10 | NM_001177520  | NA          | 0.000000               | 1                           |
| HSPG2       | 1   | 22206699              | G   | T   | c.C2247A  | p.H749Q    | exon17 | NM_001291860  | NA          | 0.000413               | 2                           |
| KIAA0754    | 1   | 39879446              | C   | T   | c.C3509T  | p.A1170V   | exon1  | NM_015038     | NA          | 0.000828               | 0                           |
| CCDC30      | 1   | 43047046              | C   | T   | c.C1081T  | p.R361W    | exon8  | NM_001080850  | NA          | 0.000000               | 4                           |
| HOOK1       | 1   | 60314066              | C   | T   | c.C1009T  | p.R337C    | exon11 | NM_015888     | NA          | 0.000829               | 6                           |
| DOCK7       | 1   | 63050524              | G   | A   | c.C1826T  | p.P609L    | exon16 | NM_001272002  | NA          | 0.000000               | 0                           |
| IL23R       | 1   | 67705932              | G   | C   | c.G1116C  | p.L372F    | exon9  | NM_144701     | rs199542433 | 0.000414               | 6                           |
| IL23R       | 1   | 67705933              | A   | T   | c.A1117T  | p.I373F    | exon9  | NM_144701     | rs201752419 | 0.000414               | 3                           |
| C1orf146    | 1   | 92709776              | G   | A   | c.G163A   | p.V55I     | exon4  | NM_001012425  | NA          | 0.000000               | 2                           |
| CD101       | 1   | 117556339             | A   | G   | c.A1153G  | p.T385A    | exon4  | NM_001256106  | NA          | 0.000428               | 0                           |
| HFE2        | 1   | 145416517             | C   | T   | c.C184T   | p.R62W     | exon2  | NM_213652     | NA          | 0.000000               | 8                           |
| MRPL9       | 1   | 151735817             | G   | A   | c.C139T   | p.L47F     | exon1  | NM_001300733  | NA          | 0.000414               | 4                           |
| NES         | 1   | 156639758             | C   | T   | c.G4222A  | p.E1408K   | exon4  | NM_006617     | NA          | 0.000000               | 4                           |
| INSRR       | 1   | 156821447             | G   | A   | c.C1075T  | p.R359C    | exon4  | NM_014215     | NA          | 0.000413               | 6                           |
| OR10R2      | 1   | 158449783             | G   | A   | c.G116A   | p.S39N     | exon1  | NM_001004472  | rs139828408 | 0.000000               | 1                           |
| PYHIN1      | 1   | 158908991             | C   | G   | c.C533G   | p.P178R    | exon4  | NM_152501     | rs79928064  | 0.000000               | 0                           |
| ARHGAP30    | 1   | 161018556             | C   | G   | c.G1724C  | p.R575T    | exon8  | NM_001287602  | NA          | 0.000000               | 0                           |
| NOS1AP      | 1   | 162313766             | G   | A   | c.G580A   | p.G194S    | exon6  | NM_001164757  | NA          | 0.000000               | 3                           |
| SELL        | 1   | 169677900             | A   | G   | c.T169C   | p.S57P     | exon3  | NM_000655     | NA          | 0.000000               | 5                           |
| SUCO        | 1   | 172501689             | G   | C   | c.G77C    | p.G26A     | exon1  | NM_016227     | NA          | 0.000000               | 1                           |
| TOR3A       | 1   | 179054915             | G   | A   | c.G526A   | p.V176M    | exon3  | NM_022371     | NA          | 0.000000               | 3                           |
| SMG7        | 1   | 183515464             | C   | T   | c.C2608T  | p.P870S    | exon16 | NM_001174061  | NA          | 0.000545               | 3                           |
| CFH         | 1   | 196709910             | C   | T   | c.C2944T  | p.P982S    | exon18 | NM_000186     | rs149938052 | 0.000828               | 8                           |
| PIK3C2B     | 1   | 204408074             | C   | T   | c.G3505A  | p.E1169K   | exon24 | NM_002646     | rs143689889 | 0.000000               | 5                           |
| FLVCR1      | 1   | 213031874             | G   | C   | c.G80C    | p.R27T     | exon1  | NM_014053     | NA          | 0.000910               | 1                           |
| KCNK2       | 1   | 215408418             | G   | A   | c.G1199A  | p.S400N    | exon7  | NM_001017424  | rs76873069  | 0.000000               | 6                           |
| EPRS        | 1   | 220206940             | T   | C   | c.A292G   | p.T98A     | exon4  | NM_004446     | NA          | 0.000000               | 2                           |
| HLX         | 1   | 221053600             | A   | C   | c.A401C   | p.Q134P    | exon1  | NM_021958     | rs201006102 | 0.000845               | 1                           |
| DNAH14      | 1   | 225211527             | A   | G   | c.A1318G  | p.M440V    | exon11 | NM_001145154  | NA          | 0.000000               | 0                           |
| CDC42BPA    | 1   | 227216678             | C   | G   | c.G3764C  | p.R1255P   | exon28 | NM_014826     | NA          | 0.000413               | 6                           |
| OBSCN       | 1   | 228402755             | T   | A   | c.T1784A  | p.F595Y    | exon5  | NM_001098623  | NA          | 0.000000               | 2                           |
| LYST        | 1   | 235926144             | C   | G   | c.G6129C  | p.K2043N   | exon22 | NM_000081     | NA          | 0.000000               | 2                           |
| ACTN2       | 1   | 236906343             | G   | A   | c.G1255A  | p.G419S    | exon11 | NM_001103     | NA          | 0.000414               | 6                           |
| KIF26B      | 1   | 245850232             | C   | T   | c.C3947T  | p.S1316L   | exon12 | NM_018012     | NA          | 0.000000               | 2                           |
| OR1C1       | 1   | 247921589             | C   | G   | c.G120C   | p.L40F     | exon1  | NM_012353     | rs201462993 | 0.000000               | 0                           |
| WDR35       | 2   | 20138102              | T   | C   | c.A1987G  | p.S663G    | exon18 | NM_020779     | NA          | 0.000826               | 5                           |
| APOB        | 2   | 21229457              | G   | T   | c.C10283A | p.T3428N   | exon26 | NM_000384     | NA          | 0.000413               | 0                           |
| ADCY3       | 2   | 25050816              | C   | T   | c.G2387A  | p.R796H    | exon13 | NM_004036     | rs372560995 | 0.000413               | 2                           |
| HADHB       | 2   | 26502162              | G   | A   | c.G745A   | p.V249M    | exon8  | NM_001281512  | NA          | 0.000413               | 1                           |
| SLC5A6      | 2   | 27430151              | C   | T   | c.G368A   | p.R123H    | exon3  | NM_021095     | rs188933728 | 0.000000               | 5                           |
| BIRC6       | 2   | 32727916              | G   | C   | c.G9262C  | p.V3088L   | exon48 | NM_016252     | NA          | 0.000000               | 7                           |
| BIRC6       | 2   | 32740551              | G   | T   | c.G11063T | p.R3688M   | exon55 | NM_016252     | NA          | 0.000000               | 7                           |
| DYNC2L1     | 2   | 44032327              | C   | T   | c.C938T   | p.A313V    | exon12 | NM_001193464  | rs147707047 | 0.000413               | 5                           |
| FANCL       | 2   | 58449116              | G   | A   | c.C335T   | p.S112L    | exon5  | NM_001114636  | NA          | 0.000413               | 4                           |
| BCL11A      | 2   | 60688494              | C   | T   | c.G1553A  | p.S518N    | exon4  | NM_018014     | NA          | 0.000000               | 4                           |
| AFTPH       | 2   | 64779380              | G   | A   | c.G772A   | p.A258T    | exon2  | NM_001002243  | NA          | 0.000826               | 0                           |
| EGR4        | 2   | 73519027              | G   | A   | c.C1328T  | p.A443V    | exon2  | NM_001965     | NA          | 0.000000               | 0                           |
| ACTR1B      | 2   | 98274979              | C   | T   | c.G568A   | p.V190I    | exon6  | NM_005735     | NA          | 0.000000               | 4                           |
| DARS        | 2   | 136700968             | C   | T   | c.G103A   | p.V35I     | exon4  | NM_001293312  | rs140573664 | 0.000000               | 4                           |
| XIRP2       | 2   | 168103167             | G   | C   | c.G4599C  | p.L1533F   | exon7  | NM_001199144  | NA          | 0.000000               | 4                           |
| PDE11A      | 2   | 178879115             | G   | A   | c.C985T   | p.R329X    | exon2  | NM_016953     | rs188985665 | 0.000826               | 1                           |
| AOX1        | 2   | 201527649             | C   | T   | c.C3500T  | p.A1167V   | exon31 | NM_001159     | rs35345784  | 0.000000               | 5                           |
| LANCL1      | 2   | 211319834             | G   | A   | c.C404T   | p.T135I    | exon4  | NM_001136574  | NA          | 0.000000               | 0                           |
| CATIP       | 2   | 219232598             | C   | G   | c.C1075G  | p.P359A    | exon10 | NM_198559     | NA          | 0.000414               | 0                           |
| MROH2A      | 2   | 234708903             | A   | T   | c.A1511T  | p.H504L    | exon14 | NM_001287395  | rs140951259 | 0.000000               | 0                           |
| MROH2A      | 2   | 234740136             | G   | A   | c.G4726A  | p.A1576T   | exon39 | NM_001287395  | rs879665    | 0.000000               | 0                           |
| COL6A3      | 2   | 238275503             | A   | G   | c.T3506C  | p.V1169A   | exon8  | NM_057166     | NA          | 0.000000               | 8                           |
| AGXT        | 2   | 241808686             | G   | T   | c.G265T   | p.A89S     | exon2  | NM_000030     | NA          | 0.000000               | 5                           |
| PASK        | 2   | 242066279             | G   | C   | c.C2051G  | p.P684R    | exon10 | NM_001252119  | rs56372985  | 0.000827               | 1                           |
| PLCD1       | 3   | 38050766              | A   | G   | c.T1666C  | p.S556P    | exon10 | NM_001130964  | NA          | 0.000000               | 3                           |
| SLC22A13    | 3   | 38316953              | G   | A   | c.C899A   | p.R300Q    | exon5  | NM_004256     | rs145061420 | 0.000413               | 2                           |
| NME6        | 3   | 48338264              | A   | G   | c.T111C   | p.L4P      | exon2  | NM_001308434  | NA          | 0.000000               | 6                           |
| ALAS1       | 3   | 52236598              | C   | T   | c.C275T   | p.P92L     | exon3  | NM_001304443  | rs370171958 | 0.000826               | 8                           |
| CADPS       | 3   | 62467420              | T   | C   | c.A3151G  | p.M1051V   | exon22 | NM_003716     | NA          | 0.000000               | 5                           |
| ATXN7       | 3   | 63981783              | C   | T   | c.C1850T  | p.T617M    | exon8  | NM_001128149  | rs368650687 | 0.000413               | 1                           |
| SUCLG2      | 3   | 67578623              | G   | A   | c.C350T   | p.A117V    | exon4  | NM_001177599  | NA          | 0.000000               | 5                           |
| OR5K3       | 3   | 98109652              | T   | A   | c.T143A   | p.L48X     | exon1  | NM_001005516  | NA          | 0.000826               | 3                           |

|           |   |           |   |   |           |          |        |              |             |          |   |
|-----------|---|-----------|---|---|-----------|----------|--------|--------------|-------------|----------|---|
| ZNF80     | 3 | 13935594  | G | A | c.A292D   | p.C100E  | exon11 | NM_007136    | NA          | 0.000826 | 4 |
| ARHGAP31  | 3 | 119134525 | A | A | c.A3749C  | p.D1250A | exon12 | NM_020754    | NA          | 0.000000 | 2 |
| GPR156    | 3 | 119885889 | G | A | c.C2423T  | p.T808M  | exon9  | NM_001168271 | rs200926939 | 0.000413 | 5 |
| SEMA5B    | 3 | 122634697 | C | T | c.G1555A  | p.G519R  | exon12 | NM_001256348 | rs183425023 | 0.000000 | 0 |
| UMPS      | 3 | 124456826 | C | T | c.C722T   | p.S241L  | exon3  | NM_000373    | NA          | 0.000000 | 2 |
| COL6A5    | 3 | 130190716 | G | A | c.G7765A  | p.A2589T | exon40 | NM_001278298 | rs73868680  | 0.000000 | 1 |
| HLTF      | 3 | 148778571 | A | T | c.T1235A  | p.M412K  | exon11 | NM_003071    | rs201653124 | 0.000000 | 1 |
| ERICH6    | 3 | 150387158 | G | A | c.C986T   | p.P329L  | exon12 | NM_001308234 | rs200581445 | 0.000413 | 1 |
| GMPS      | 3 | 155633905 | T | G | c.T1136G  | p.L379R  | exon9  | NM_003875    | NA          | 0.000000 | 5 |
| SLC7A14   | 3 | 170198612 | G | C | c.C1459G  | p.P487A  | exon7  | NM_020949    | NA          | 0.000000 | 7 |
| USP13     | 3 | 179399676 | G | C | c.G179C   | p.G60A   | exon2  | NM_003940    | NA          | 0.000000 | 5 |
| C3orf70   | 3 | 184800841 | G | A | c.C707T   | p.S236L  | exon2  | NM_001025266 | rs201783027 | 0.000413 | 7 |
| SLC26A1   | 4 | 985463    | T | C | c.A29G    | p.Q10R   | exon2  | NM_022042    | NA          | 0.000439 | 1 |
| FAM53A    | 4 | 1646051   | C | T | c.G901A   | p.E301K  | exon5  | NM_001297435 | NA          | 0.000000 | 0 |
| HTT       | 4 | 3240332   | A | G | c.A9050G  | p.Y3017C | exon65 | NM_002111    | NA          | 0.000000 | 3 |
| TMEM128   | 4 | 4249884   | G | T | c.C46A    | p.L16I   | exon1  | NM_001297551 | rs6854167   | 0.000000 | 0 |
| WFS1      | 4 | 6302786   | G | T | c.G1264T  | p.A422S  | exon8  | NM_001145853 | NA          | 0.000413 | 4 |
| LOC389199 | 4 | 7940903   | A | G | c.A11G    | p.Q4R    | exon1  | NM_203423    | rs7695170   | 0.000000 | 1 |
| LOC389199 | 4 | 7940915   | A | T | c.C23T    | p.P8L    | exon1  | NM_203423    | rs7669645   | 0.000000 | 1 |
| GPR78     | 4 | 8582821   | A | C | c.A112C   | p.T38P   | exon1  | NM_080819    | NA          | 0.000000 | 1 |
| BMP2K     | 4 | 79747277  | C | A | c.C265A   | p.L89I   | exon2  | NM_017593    | NA          | 0.000414 | 6 |
| HNRNPDL   | 4 | 83347711  | C | G | c.G1097C  | p.G366A  | exon6  | NM_031372    | rs200123403 | 0.000826 | 6 |
| SPARCL1   | 4 | 88403697  | G | A | c.C1172T  | p.T391M  | exon6  | NM_001291977 | rs199501739 | 0.000000 | 4 |
| ANK2      | 4 | 114288871 | G | A | c.G4927A  | p.V1643I | exon41 | NM_020977    | NA          | 0.000826 | 0 |
| MAML3     | 4 | 140811296 | G | A | c.C1294T  | p.P432S  | exon2  | NM_018717    | NA          | 0.000000 | 1 |
| ELMOD2    | 4 | 141446643 | C | G | c.C61G    | p.L21V   | exon2  | NM_153702    | rs201497167 | 0.000000 | 1 |
| HHIP      | 4 | 145627795 | A | G | c.A944G   | p.H315R  | exon5  | NM_022475    | NA          | 0.000000 | 6 |
| PRMT9     | 4 | 148575205 | G | C | c.C1504G  | p.H502D  | exon8  | NM_001304458 | NA          | 0.000000 | 5 |
| PRMT9     | 4 | 148605066 | C | G | c.G73C    | p.V25L   | exon1  | NM_138364    | NA          | 0.000000 | 4 |
| LRBA      | 4 | 151788842 | A | G | c.T2747C  | p.L916S  | exon22 | NM_001199282 | NA          | 0.000000 | 7 |
| TMEM154   | 4 | 153601028 | C | A | c.G58T    | p.G20C   | exon1  | NM_152680    | NA          | 0.000000 | 1 |
| GRIA2     | 4 | 158253975 | C | T | c.C887T   | p.T296I  | exon7  | NM_000826    | NA          | 0.000000 | 7 |
| SH3RF1    | 4 | 170189972 | C | G | c.G392C   | p.R131T  | exon2  | NM_020870    | rs200790356 | 0.000000 | 4 |
| NEK1      | 4 | 170483332 | C | A | c.G1036T  | p.E346X  | exon12 | NM_001199400 | NA          | 0.000000 | 1 |
| SCRG1     | 4 | 174312559 | G | C | c.C7G     | p.L3V    | exon2  | NM_007281    | NA          | 0.000829 | 0 |
| CFAP97    | 4 | 186111851 | C | T | c.G500A   | p.C167Y  | exon2  | NM_001292033 | rs182552516 | 0.000413 | 0 |
| LRP2BP    | 4 | 186295608 | C | T | c.G338A   | p.G113E  | exon4  | NM_018409    | NA          | 0.000413 | 7 |
| AHR       | 5 | 434456    | A | G | c.A1613G  | p.K538R  | exon11 | NM_001242412 | NA          | 0.000000 | 4 |
| ICE1      | 5 | 5462961   | A | T | c.A3514T  | p.T1172S | exon13 | NM_015325    | NA          | 0.000000 | 0 |
| TRIO      | 5 | 14143940  | G | C | c.G106C   | p.A36P   | exon1  | NM_007118    | NA          | 0.000911 | 0 |
| C5orf42   | 5 | 37167291  | G | A | c.C7258T  | p.L2420F | exon35 | NM_023073    | NA          | 0.000000 | 4 |
| ZSWIM6    | 5 | 60840041  | C | T | c.C3545T  | p.A1182V | exon14 | NM_020928    | NA          | 0.000000 | 6 |
| MAST4     | 5 | 65892790  | G | A | c.G307A   | p.A103T  | exon1  | NM_001164664 | NA          | 0.000000 | 0 |
| ANKRD31   | 5 | 74491679  | G | C | c.C794G   | p.P265R  | exon7  | NM_001164443 | rs185973227 | 0.000000 | 0 |
| POLK      | 5 | 74886182  | A | G | c.A1273G  | p.I425V  | exon11 | NM_016218    | NA          | 0.000000 | 2 |
| SLF1      | 5 | 94014564  | A | G | c.A1879G  | p.I627V  | exon15 | NM_032290    | NA          | 0.000000 | 0 |
| PPIC      | 5 | 122359668 | T | G | c.A541C   | p.T181P  | exon5  | NM_000943    | rs149059275 | 0.000826 | 7 |
| FBN2      | 5 | 127624229 | C | T | c.G6658A  | p.G2220S | exon53 | NM_001999    | NA          | 0.000000 | 2 |
| FNIP1     | 5 | 131008060 | C | G | c.G1993C  | p.A665P  | exon13 | NM_001008738 | NA          | 0.000000 | 1 |
| P4HA2     | 5 | 131528750 | G | A | c.C1555T  | p.R519X  | exon15 | NM_001017973 | rs200583507 | 0.000414 | 4 |
| PCDHGB2   | 5 | 140740144 | C | T | c.C442T   | p.P148S  | exon1  | NM_018923    | NA          | 0.000000 | 1 |
| DPYSL3    | 5 | 146777371 | C | T | c.G1661A  | p.R554H  | exon12 | NM_001197294 | rs188735247 | 0.000000 | 5 |
| RANBP17   | 5 | 170380604 | G | A | c.G1472A  | p.R491H  | exon13 | NM_022897    | rs139638431 | 0.000000 | 6 |
| VAR2      | 6 | 30892159  | C | T | c.C2075T  | p.S692L  | exon25 | NM_001167733 | rs138341222 | 0.000000 | 0 |
| BTBD9     | 6 | 38256214  | T | C | c.A1084G  | p.I362V  | exon7  | NM_152733    | NA          | 0.000000 | 3 |
| DNAH8     | 6 | 38957803  | A | G | c.A13069G | p.K4357E | exon88 | NM_001206927 | rs139250593 | 0.000828 | 2 |
| CUL9      | 6 | 43167698  | G | A | c.G3188A  | p.R1063H | exon14 | NM_015089    | NA          | 0.000000 | 2 |
| RRAGD     | 6 | 90121613  | C | G | c.G100C   | p.G34R   | exon1  | NM_021244    | NA          | 0.000000 | 3 |
| SLC22A16  | 6 | 110746218 | C | T | c.G1592A  | p.R531Q  | exon8  | NM_033125    | NA          | 0.000000 | 2 |
| RSPH4A    | 6 | 116953437 | C | T | c.C1984T  | p.P662S  | exon6  | NM_001010892 | NA          | 0.000000 | 6 |
| STXBP5    | 6 | 147599259 | A | G | c.A757G   | p.I253V  | exon8  | NM_001127715 | NA          | 0.000826 | 2 |
| SYNE1     | 6 | 152674804 | C | T | c.G10957A | p.E3653K | exon68 | NM_033071    | NA          | 0.000000 | 6 |
| TULP4     | 6 | 158850898 | C | T | c.C512T   | p.T171M  | exon3  | NM_001007466 | NA          | 0.000419 | 4 |
| C7orf50   | 7 | 1040177   | T | C | c.A334G   | p.K112E  | exon4  | NM_001134395 | NA          | 0.000837 | 1 |
| USP42     | 7 | 6194357   | A | T | c.A3172T  | p.R1058W | exon15 | NM_032172    | NA          | 0.000000 | 2 |
| ABCB5     | 7 | 20739694  | G | A | c.G938A   | p.G313D  | exon10 | NM_178559    | NA          | 0.000414 | 8 |
| CRHR2     | 7 | 30702316  | C | T | c.G688A   | p.G230R  | exon6  | NM_001202482 | rs569607645 | 0.000414 | 9 |
| AMPH      | 7 | 38670924  | C | A | c.G28T    | p.A10S   | exon1  | NM_001635    | NA          | 0.000000 | 2 |
| PKD1L1    | 7 | 47886553  | A | G | c.T5077C  | p.F1693L | exon32 | NM_138295    | NA          | 0.000000 | 0 |
| ZNF117    | 7 | 64439432  | C | T | c.G517A   | p.A173T  | exon4  | NM_015852    | NA          | 0.000000 | 0 |
| ZSCAN1    | 7 | 99655438  | G | A | c.G517A   | p.E173K  | exon3  | NM_145914    | NA          | 0.000000 | 3 |
| AP4M1     | 7 | 99703902  | G | C | c.G1013C  | p.R338P  | exon13 | NM_004722    | NA          | 0.000000 | 2 |
| Orai2     | 7 | 102087451 | G | C | c.G486C   | p.K162N  | exon3  | NM_001271819 | NA          | 0.000000 | 2 |
| GRM8      | 7 | 126409942 | T | C | c.A1334G  | p.Y445C  | exon6  | NM_000845    | NA          | 0.000000 | 9 |
| AOC1      | 7 | 150554973 | A | G | c.A1415G  | p.N472S  | exon2  | NM_001091    | NA          | 0.000000 | 3 |
| ABCB8     | 7 | 150737585 | G | A | c.G988A   | p.V330M  | exon10 | NM_001282293 | NA          | 0.000000 | 4 |
| CHPF2     | 7 | 150929872 | C | T | c.C22T    | p.P8S    | exon1  | NM_001284295 | rs374377569 | 0.000000 | 1 |
| ADAM28    | 8 | 24178758  | G | A | c.G676A   | p.E226K  | exon8  | NM_001304351 | NA          | 0.000000 | 0 |
| ADAM7     | 8 | 24349579  | G | A | c.G1520A  | p.R507H  | exon14 | NM_003817    | NA          | 0.000000 | 4 |
| PBK       | 8 | 27678103  | G | T | c.C574A   | p.P192T  | exon6  | NM_001278945 | rs200662690 | 0.000826 | 1 |
| ZFH4      | 8 | 77762550  | C | T | c.C3916T  | p.R1306W | exon9  | NM_024721    | NA          | 0.000414 | 1 |
| ZFAND1    | 8 | 82626176  | C | T | c.G457A   | p.D153N  | exon6  | NM_001170796 | NA          | 0.000000 | 0 |



medRxiv preprint doi: <https://doi.org/10.1101/2023.08.24.23294455>; this version posted August 25, 2023. The copyright holder for this preprint (which was not certified by peer review) is the author/funder, who has granted medRxiv a license to display the preprint in perpetuity. It is made available under a CC-BY 4.0 International license.

| Gene             | Chromosome | Position  | Strand | RefSeq ID | Transcript ID | Exon     | rsID         | Distance     | r2          |          |
|------------------|------------|-----------|--------|-----------|---------------|----------|--------------|--------------|-------------|----------|
| ZNF707           | 8          | 44776284  | C      | c.C958    | p.C958        | exon14   | NM_001288808 | NA           | 0.000000    |          |
| KANK1            | 9          | 731164    | C      | c.C2429   | p.T810        | exon4    | NM_153186    | rs114209322  | 0.000826    |          |
| RIC1             | 9          | 5756326   | G      | A         | c.G1696A      | p.A566T  | exon15       | NM_001206557 | rs145216888 | 0.000827 |
| UHRF2            | 9          | 6421108   | C      | A         | c.C350A       | p.A117D  | exon2        | NM_152896    | NA          | 0.000000 |
| MPDZ             | 9          | 13222290  | C      | T         | c.G689A       | p.S230N  | exon6        | NM_001261406 | NA          | 0.000000 |
| PSIP1            | 9          | 15486844  | T      | C         | c.A374G       | p.E125G  | exon4        | NM_021144    | NA          | 0.000000 |
| BNC2             | 9          | 16436081  | T      | C         | c.A2111G      | p.E704G  | exon6        | NM_017637    | NA          | 0.000000 |
| HAUS6            | 9          | 19063095  | T      | G         | c.A1435C      | p.K479Q  | exon14       | NM_001270890 | rs147787866 | 0.000000 |
| C9orf72          | 9          | 27562432  | C      | T         | c.G547A       | p.V183I  | exon4        | NM_001256054 | NA          | 0.000422 |
| TMEM8B           | 9          | 35842551  | G      | A         | c.G116A       | p.R39H   | exon6        | NM_001042590 | NA          | 0.000000 |
| SHB              | 9          | 38068006  | T      | C         | c.A637G       | p.T213A  | exon1        | NM_003028    | NA          | 0.000880 |
| PRUNE2           | 9          | 79323007  | C      | T         | c.G4183A      | p.E1395K | exon8        | NM_001308047 | NA          | 0.000000 |
| NOL8             | 9          | 95085735  | C      | T         | c.G190A       | p.D64N   | exon3        | NM_017948    | rs151033269 | 0.000827 |
| FBP2             | 9          | 97355952  | C      | T         | c.G57A        | p.M19I   | exon1        | NM_003837    | NA          | 0.000000 |
| ERCC6L2          | 9          | 98684666  | C      | T         | c.C1412T      | p.A471V  | exon8        | NM_001010895 | rs201546231 | 0.000829 |
| TBC1D2           | 9          | 100962538 | C      | T         | c.G1196A      | p.S399N  | exon6        | NM_001267572 | NA          | 0.000000 |
| GALNT12          | 9          | 101570348 | C      | A         | c.C368A       | p.P123Q  | exon1        | NM_024642    | NA          | 0.000000 |
| ARPC5L           | 9          | 127639182 | C      | G         | c.C425G       | p.S142C  | exon4        | NM_030978    | rs150162831 | 0.000828 |
| FAM102A          | 9          | 130707095 | C      | T         | c.G574A       | p.V192M  | exon6        | NM_203305    | NA          | 0.000000 |
| SLC27A4          | 9          | 131117979 | T      | C         | c.T1678C      | p.C560R  | exon12       | NM_005094    | NA          | 0.000827 |
| PHYHD1           | 9          | 131702696 | G      | A         | c.G443A       | p.R148Q  | exon7        | NM_001100877 | rs200845438 | 0.000413 |
| TTF1             | 9          | 135277447 | C      | G         | c.G762C       | p.Q254H  | exon2        | NM_007344    | NA          | 0.000000 |
| DPH7             | 9          | 140449957 | C      | T         | c.G1093A      | p.A365T  | exon9        | NM_138778    | NA          | 0.000000 |
| SFMBT2           | 10         | 7423832   | A      | G         | c.T29C        | p.M10T   | exon2        | NM_001018039 | rs141352828 | 0.000000 |
| RBP3             | 10         | 48388554  | G      | A         | c.C2324T      | p.T775M  | exon1        | NM_002900    | rs201724324 | 0.000415 |
| PPA1             | 10         | 71977620  | G      | T         | c.C245A       | p.A82E   | exon4        | NM_021129    | NA          | 0.000000 |
| TBATA            | 10         | 72541674  | G      | A         | c.C160T       | p.R54W   | exon4        | NM_152710    | NA          | 0.000414 |
| CDH23            | 10         | 73538046  | G      | A         | c.G5168A      | p.R1723H | exon38       | NM_022124    | rs189361642 | 0.000000 |
| FBXW4            | 10         | 103384550 | G      | A         | c.C788T       | p.T263M  | exon6        | NM_022039    | NA          | 0.000000 |
| KNDC1            | 10         | 135020716 | G      | A         | c.G3655A      | p.D1219N | exon20       | NM_152643    | NA          | 0.000000 |
| SIGIRR           | 11         | 406932    | G      | C         | c.C790G       | p.Q264E  | exon8        | NM_001135053 | NA          | 0.000434 |
| RASSF7           | 11         | 562229    | C      | T         | c.C275T       | p.A92V   | exon3        | NM_001143993 | NA          | 0.000000 |
| TMEM80           | 11         | 704536    | G      | A         | c.G742A       | p.A248T  | exon6        | NM_001276274 | rs140750324 | 0.000000 |
| OTOG             | 11         | 17593709  | T      | C         | c.T2074C      | p.S692P  | exon17       | NM_001277269 | rs7106548   | 0.000000 |
| OTOG             | 11         | 17667439  | G      | C         | c.G8726C      | p.W2909S | exon55       | NM_001277269 | rs11024357  | 0.000000 |
| LGR4             | 11         | 27390603  | T      | C         | c.A1667G      | p.N556S  | exon18       | NM_018490    | NA          | 0.000000 |
| DCDC1            | 11         | 31327261  | C      | T         | c.G655A       | p.D219N  | exon6        | NM_181807    | NA          | 0.000000 |
| ELP4             | 11         | 31703564  | C      | T         | c.C1373T      | p.T458I  | exon10       | NM_001288726 | NA          | 0.000000 |
| PAX6             | 11         | 31814879  | G      | A         | c.C1139T      | p.S380L  | exon9        | NM_001310159 | rs3026384   | 0.000000 |
| ACCS             | 11         | 44104752  | A      | G         | c.A1145G      | p.H382R  | exon13       | NM_001127219 | rs201202479 | 0.000833 |
| MYBPC3           | 11         | 47360898  | C      | T         | c.G2125A      | p.D709N  | exon21       | NM_000256    | NA          | 0.000000 |
| OR5D18           | 11         | 55587892  | C      | T         | c.C787T       | p.P263S  | exon1        | NM_001001952 | NA          | 0.000000 |
| OR5W2            | 11         | 55682040  | A      | G         | c.T19C        | p.S7P    | exon1        | NM_001001960 | NA          | 0.000000 |
| OR9Q2            | 11         | 57958338  | G      | A         | c.G376A       | p.V126M  | exon1        | NM_001005283 | NA          | 0.000413 |
| BEST1            | 11         | 61727452  | C      | A         | c.C776A       | p.P259H  | exon7        | NM_001300786 | NA          | 0.000416 |
| ATG2A            | 11         | 64669448  | C      | T         | c.G4105A      | p.G1369S | exon29       | NM_015104    | rs143404952 | 0.000000 |
| PCNXL3           | 11         | 65403904  | C      | T         | c.C5636T      | p.P1879L | exon34       | NM_032223    | NA          | 0.000000 |
| SART1            | 11         | 65744148  | C      | T         | c.C1768T      | p.R590C  | exon14       | NM_005146    | NA          | 0.000538 |
| LRP5             | 11         | 68207302  | G      | C         | c.G2663C      | p.G888A  | exon21       | NM_001291902 | NA          | 0.000000 |
| TPCN2            | 11         | 68848873  | C      | T         | c.C1595T      | p.P532L  | exon18       | NM_139075    | NA          | 0.000000 |
| PLEKHB1          | 11         | 73362899  | G      | A         | c.G257A       | p.R86H   | exon3        | NM_001130036 | rs184116184 | 0.000426 |
| FAT3             | 11         | 92086054  | T      | G         | c.T776G       | p.I259R  | exon1        | NM_001008781 | NA          | 0.000000 |
| KDM4E            | 11         | 94758987  | A      | G         | c.A266G       | p.K89R   | exon1        | NM_001161630 | NA          | 0.000000 |
| PGR              | 11         | 100933406 | C      | T         | c.G1984A      | p.V662I  | exon4        | NM_000926    | rs150584881 | 0.000413 |
| MMP13            | 11         | 102816478 | T      | G         | c.A1212C      | p.R404S  | exon9        | NM_002427    | NA          | 0.000414 |
| OR10S1           | 11         | 123847636 | A      | G         | c.T763C       | p.C255R  | exon1        | NM_001004474 | NA          | 0.000000 |
| OR10G7           | 11         | 123908916 | C      | A         | c.G793T       | p.D265Y  | exon1        | NM_001004463 | NA          | 0.000000 |
| KLRC3            | 12         | 10568304  | A      | G         | c.T677C       | p.I226T  | exon6        | NM_002261    | NA          | 0.000000 |
| TAS2R20          | 12         | 11149658  | A      | G         | c.T817C       | p.S273P  | exon1        | NM_176889    | rs150448607 | 0.000413 |
| PDE3A            | 12         | 20522343  | G      | C         | c.G125C       | p.G42A   | exon1        | NM_000921    | NA          | 0.000424 |
| HDAC7            | 12         | 48189043  | C      | G         | c.G1097C      | p.S366T  | exon10       | NM_001098416 | NA          | 0.000000 |
| ASIC1            | 12         | 50468007  | G      | A         | c.G640A       | p.G214S  | exon1        | NM_001256830 | NA          | 0.000000 |
| MARS             | 12         | 57894189  | G      | A         | c.G1177A      | p.A393T  | exon10       | NM_004990    | rs141340466 | 0.000827 |
| ARHGEF25         | 12         | 58010651  | G      | T         | c.G1717T      | p.A573S  | exon15       | NM_182947    | NA          | 0.000000 |
| SRGAP1           | 12         | 64437300  | C      | T         | c.C746T       | p.A249V  | exon6        | NM_020762    | NA          | 0.000000 |
| SRGAP1           | 12         | 64536271  | G      | A         | c.G3077A      | p.R1026H | exon22       | NM_020762    | NA          | 0.000000 |
| GNS              | 12         | 65110525  | A      | G         | c.T1655C      | p.L552P  | exon14       | NM_002076    | NA          | 0.000000 |
| TBC1D30          | 12         | 65237176  | G      | C         | c.C949C       | p.E317Q  | exon8        | NM_015279    | NA          | 0.000430 |
| OSBPL8           | 12         | 76763472  | A      | C         | c.T2059G      | p.C687G  | exon19       | NM_001003712 | rs199664136 | 0.000000 |
| POC1B            | 12         | 89866042  | C      | T         | c.G337A       | p.D113N  | exon4        | NM_001199777 | NA          | 0.000826 |
| UHRF1BP1L        | 12         | 100452762 | G      | A         | c.C2293T      | p.R765W  | exon14       | NM_015054    | rs369358032 | 0.000826 |
| ACACB            | 12         | 109577466 | G      | A         | c.G256A       | p.G86S   | exon1        | NM_001093    | rs371386144 | 0.000000 |
| OAS1             | 12         | 113346391 | C      | G         | c.C231G       | p.D77E   | exon2        | NM_001032409 | NA          | 0.000000 |
| MED13L           | 12         | 116457747 | G      | A         | c.C656T       | p.T219M  | exon6        | NM_015335    | rs191743300 | 0.000000 |
| ACADS            | 12         | 121176662 | C      | T         | c.C973T       | p.R325W  | exon8        | NM_000017    | rs121908006 | 0.000000 |
| LRRC63           | 13         | 46840996  | A      | C         | c.A1439C      | p.Y480S  | exon9        | NM_001282460 | rs41284167  | 0.000000 |
| BIVM-ERCC5,ERCC5 | 13         | 103515408 | G      | T         | c.G1909T      | p.A637S  | exon8        | NM_000123    | NA          | 0.000000 |
| PARP2            | 14         | 20820490  | A      | G         | c.A584G       | p.Y195C  | exon7        | NM_001042618 | rs369902077 | 0.000826 |
| RNASE11          | 14         | 21052549  | C      | A         | c.G85T        | p.E29X   | exon3        | NM_145250    | NA          | 0.000826 |
| TTC6             | 14         | 38091460  | G      | C         | c.G239C       | p.R80P   | exon3        | NM_001310135 | NA          | 0.000000 |
| TTC6             | 14         | 38256794  | T      | C         | c.T3436C      | p.F1146L | exon17       | NM_001310135 | rs75245849  | 0.000000 |
| KLHL28           | 14         | 45414389  | C      | T         | c.G785A       | p.R262H  | exon2        | NM_001308112 | rs199672203 | 0.000826 |

|                    |    |           |   |   |   |          |          |        |              |             |          |   |
|--------------------|----|-----------|---|---|---|----------|----------|--------|--------------|-------------|----------|---|
| SAVI               | 14 | 51711693  | C | I | A | c.A1877  | p.L951F  | exon13 | NM_021818    | NA          | 0.000000 | 3 |
| CHURC1.CHURC1-FNTB | 14 | 65381181  | C | A | C | c.G49    | p.R17C   | exon1  | NM_0202559   | NA          | 0.000414 | 2 |
| PLEKHH1            | 14 | 68038492  | G | A | C | c.G1458A | p.M486I  | exon10 | NM_020715    | NA          | 0.000833 | 1 |
| BDKRB1             | 14 | 96730381  | T | A | C | c.T362A  | p.L121X  | exon3  | NM_000710    | NA          | 0.000000 | 3 |
| AMN                | 14 | 103394845 | G | A | C | c.G290A  | p.G97D   | exon4  | NM_030943    | NA          | 0.000906 | 1 |
| PACS2              | 14 | 105849743 | C | T | C | c.C1673T | p.A558V  | exon16 | NM_001100913 | NA          | 0.000000 | 3 |
| FMN1               | 15 | 33446344  | T | C | C | c.A772G  | p.K258E  | exon4  | NM_001277313 | rs61744870  | 0.000000 | 0 |
| EMC4               | 15 | 34520042  | C | G | C | c.C350G  | p.S117X  | exon3  | NM_001286420 | NA          | 0.000413 | 5 |
| CASC5              | 15 | 40937249  | C | A | C | c.C5853A | p.N1951K | exon15 | NM_144508    | NA          | 0.000000 | 0 |
| NUSAP1             | 15 | 41657631  | C | T | C | c.C620T  | p.T207I  | exon6  | NM_001243144 | NA          | 0.000000 | 1 |
| VPS39              | 15 | 42454330  | T | C | C | c.A2360G | p.N787S  | exon23 | NM_015289    | NA          | 0.000413 | 2 |
| ZSCAN29            | 15 | 43653998  | C | G | C | c.G1832C | p.C611S  | exon5  | NM_152455    | NA          | 0.000000 | 0 |
| DUOX2              | 15 | 45402687  | C | A | C | c.G979T  | p.E327X  | exon9  | NM_014080    | NA          | 0.000000 | 5 |
| VPS13C             | 15 | 62182571  | G | A | C | c.C9005T | p.A3002V | exon65 | NM_017684    | NA          | 0.000000 | 3 |
| TLN2               | 15 | 63055808  | A | C | C | c.A5008C | p.I1670L | exon37 | NM_015059    | NA          | 0.000000 | 4 |
| IGDCC4             | 15 | 65694752  | C | T | C | c.G637A  | p.V213M  | exon4  | NM_020962    | rs143723846 | 0.000000 | 6 |
| MAP2K1             | 15 | 66782894  | C | A | C | c.C1123A | p.L375I  | exon11 | NM_002755    | NA          | 0.000413 | 5 |
| TLE3               | 15 | 70349848  | C | T | C | c.G1006A | p.A336T  | exon11 | NM_001282982 | NA          | 0.000000 | 5 |
| THSD4              | 15 | 72057393  | G | A | C | c.G1544A | p.R515K  | exon10 | NM_001286429 | NA          | 0.000413 | 5 |
| NR2E3              | 15 | 72104731  | C | G | C | c.C627G  | p.Y209X  | exon5  | NM_014249    | NA          | 0.000000 | 1 |
| SH2D7              | 15 | 78393619  | T | G | C | c.T1024G | p.C342G  | exon5  | NM_001101404 | NA          | 0.000000 | 0 |
| ADAMTSL3           | 15 | 84566637  | C | T | C | c.C1495T | p.R499W  | exon14 | NM_001301110 | NA          | 0.000000 | 6 |
| PIGQ               | 16 | 632973    | C | T | C | c.C1622T | p.P541L  | exon10 | NM_148920    | NA          | 0.000425 | 2 |
| IGFALS             | 16 | 1840816   | C | T | C | c.G1717A | p.G573S  | exon2  | NM_001146006 | NA          | 0.000000 | 1 |
| RPL3L              | 16 | 1997238   | C | G | C | c.G645C  | p.E215D  | exon5  | NM_005061    | NA          | 0.000000 | 6 |
| C16orf96           | 16 | 4606707   | C | A | C | c.C217A  | p.P73T   | exon1  | NM_001145011 | NA          | 0.000827 | 0 |
| C16orf96           | 16 | 4626216   | G | A | C | c.G1735A | p.A579T  | exon5  | NM_001145011 | rs368874235 | 0.000833 | 0 |
| PPL                | 16 | 4934433   | C | T | C | c.G4223A | p.R1408H | exon22 | NM_002705    | rs140117389 | 0.000417 | 4 |
| PPL                | 16 | 4945680   | C | T | C | c.G1010A | p.R337H  | exon10 | NM_002705    | rs145641114 | 0.000000 | 0 |
| ERCC4              | 16 | 14015973  | A | G | C | c.A293G  | p.Y98C   | exon2  | NM_005236    | NA          | 0.000000 | 5 |
| GGA2               | 16 | 23479011  | C | T | C | c.G1742A | p.R581H  | exon17 | NM_015044    | rs185467966 | 0.000826 | 7 |
| ATXN2L             | 16 | 28843540  | C | A | C | c.C1354A | p.P452T  | exon11 | NM_001308230 | NA          | 0.000413 | 4 |
| RABEP2             | 16 | 28925790  | C | T | C | c.G661A  | p.A221T  | exon5  | NM_024816    | NA          | 0.000852 | 6 |
| ITGAL              | 16 | 30522254  | C | T | C | c.C2420T | p.S807L  | exon21 | NM_001114380 | rs376221007 | 0.000000 | 0 |
| SRCAP              | 16 | 30747554  | C | T | C | c.C6763T | p.R2255C | exon32 | NM_006662    | NA          | 0.000000 | 6 |
| ITFG1              | 16 | 47462720  | G | T | C | c.C311A  | p.T104K  | exon6  | NM_001305002 | NA          | 0.000000 | 6 |
| ADCY7              | 16 | 50327353  | G | A | C | c.G776A  | p.R259H  | exon5  | NM_001114    | NA          | 0.000000 | 3 |
| FAM65A             | 16 | 67579353  | C | G | C | c.C3118G | p.L1040V | exon18 | NM_001193522 | NA          | 0.000841 | 0 |
| WWP2               | 16 | 69970237  | G | T | C | c.G682T  | p.G228C  | exon9  | NM_199424    | NA          | 0.000413 | 6 |
| ZNF821             | 16 | 71898823  | C | T | C | c.G169A  | p.E57K   | exon3  | NM_017530    | NA          | 0.000000 | 0 |
| GLG1               | 16 | 74519713  | T | C | C | c.A1519G | p.I507V  | exon8  | NM_001145666 | NA          | 0.000000 | 4 |
| ATP2C2             | 16 | 84493147  | T | A | C | c.T2369A | p.V790E  | exon24 | NM_001286527 | NA          | 0.000000 | 2 |
| C16orf95           | 16 | 87339486  | C | A | C | c.G356T  | p.G119V  | exon4  | NM_001195125 | NA          | 0.000000 | 1 |
| JPH3               | 16 | 87730200  | C | G | C | c.C2181G | p.I727M  | exon5  | NM_020655    | rs200827482 | 0.000561 | 4 |
| GEMIN4             | 17 | 648141    | G | A | C | c.C3142T | p.R1048C | exon2  | NM_015721    | NA          | 0.000000 | 4 |
| BHLHA9             | 17 | 1173958   | C | T | C | c.C101T  | p.S34L   | exon1  | NM_001164405 | NA          | 0.000000 | 1 |
| METTL16            | 17 | 2324092   | C | T | C | c.G995A  | p.R332H  | exon9  | NM_024086    | rs142808274 | 0.000000 | 2 |
| OR1G1              | 17 | 3030757   | G | A | C | c.C89T   | p.S30F   | exon1  | NM_003555    | NA          | 0.000413 | 1 |
| CNTROB             | 17 | 7838405   | A | G | C | c.A536G  | p.N179S  | exon4  | NM_001037144 | NA          | 0.000417 | 3 |
| NCOR1              | 17 | 16004670  | C | T | C | c.G2305A | p.V769I  | exon17 | NM_001190438 | NA          | 0.000413 | 0 |
| MMP28              | 17 | 34122353  | C | T | C | c.G29A   | p.R10H   | exon1  | NM_001032278 | NA          | 0.000000 | 0 |
| MYO19              | 17 | 34852184  | G | A | C | c.C2224T | p.P742S  | exon23 | NM_025109    | NA          | 0.000413 | 1 |
| KLHL10             | 17 | 40003568  | A | T | C | c.A1358T | p.Y453F  | exon4  | NM_152467    | NA          | 0.000414 | 4 |
| FAM134C            | 17 | 40733974  | C | T | C | c.G1258A | p.G420R  | exon9  | NM_178126    | NA          | 0.000826 | 0 |
| WNK4               | 17 | 40948576  | G | T | C | c.G3709T | p.A1237S | exon18 | NM_032387    | NA          | 0.000414 | 3 |
| CDC27              | 17 | 45219686  | A | C | C | c.T1104G | p.I368M  | exon10 | NM_001293091 | rs78080061  | 0.000000 | 3 |
| CDC27              | 17 | 45219688  | T | C | C | c.A1102G | p.I368V  | exon10 | NM_001293091 | rs200712699 | 0.000000 | 4 |
| CDC27              | 17 | 45219702  | T | C | C | c.A1088G | p.N363S  | exon10 | NM_001293091 | rs199774308 | 0.000000 | 4 |
| CDC27              | 17 | 45232087  | T | C | C | c.A725G  | p.N242S  | exon7  | NM_001293091 | NA          | 0.000000 | 3 |
| CDC27              | 17 | 45232102  | A | C | C | c.T710G  | p.L237X  | exon7  | NM_001293091 | NA          | 0.000000 | 4 |
| CDC27              | 17 | 45232109  | A | G | C | c.T703C  | p.S235P  | exon7  | NM_001293091 | rs76383230  | 0.000000 | 4 |
| MYCBPAP            | 17 | 48585968  | G | A | C | c.G62A   | p.G21D   | exon1  | NM_032133    | NA          | 0.000000 | 2 |
| ABCC3              | 17 | 48755543  | C | T | C | c.C3668T | p.P1223L | exon25 | NM_003786    | NA          | 0.000000 | 8 |
| SOX9               | 17 | 70120115  | C | A | C | c.C1117A | p.P373T  | exon3  | NM_000346    | NA          | 0.000000 | 1 |
| DNAI2              | 17 | 72308160  | C | T | C | c.C1477T | p.R493W  | exon12 | NM_001172810 | NA          | 0.000000 | 5 |
| GPRC5C             | 17 | 72443155  | C | A | C | c.C1350A | p.Y450X  | exon4  | NM_018653    | NA          | 0.000000 | 0 |
| CD300LF            | 17 | 72699273  | G | A | C | c.C392T  | p.P131L  | exon3  | NM_001289084 | NA          | 0.000000 | 0 |
| DNAH17             | 17 | 76567792  | G | C | C | c.C612G  | p.I204M  | exon4  | NM_173628    | NA          | 0.000867 | 0 |
| CEP295NL           | 17 | 76887951  | C | T | C | c.G635A  | p.R212Q  | exon3  | NM_001243540 | NA          | 0.000000 | 0 |
| CCDC40             | 17 | 78061568  | C | T | C | c.C2612T | p.S871L  | exon15 | NM_001243342 | rs367596393 | 0.000494 | 1 |
| CEP131             | 17 | 79173297  | C | A | C | c.G1076T | p.R359L  | exon10 | NM_001009811 | NA          | 0.000000 | 0 |
| SLC38A10           | 17 | 79220401  | G | A | C | c.C2315T | p.T772M  | exon16 | NM_001037984 | rs374394310 | 0.000000 | 0 |
| CHST9              | 18 | 24497189  | A | C | C | c.T366G  | p.S122R  | exon6  | NM_031422    | NA          | 0.000000 | 0 |
| RIT2               | 18 | 40323564  | T | C | C | c.A548G  | p.K183R  | exon5  | NM_002930    | NA          | 0.000000 | 1 |
| SALL3              | 18 | 76753088  | C | T | C | c.C1097T | p.T366I  | exon2  | NM_171999    | NA          | 0.000858 | 2 |
| SBNO2              | 19 | 1123586   | T | G | C | c.A404C  | p.E135A  | exon4  | NM_001100122 | NA          | 0.000000 | 2 |
| GAMT               | 19 | 1399827   | G | A | C | c.C292T  | p.R98W   | exon2  | NM_000156    | NA          | 0.000000 | 5 |
| PTPRS              | 19 | 5214604   | C | T | C | c.G3121A | p.V1041I | exon20 | NM_130853    | rs116515629 | 0.000827 | 2 |
| ANGPTL4            | 19 | 8436337   | G | A | C | c.G856A  | p.V286I  | exon5  | NM_001039667 | rs200918932 | 0.000000 | 1 |
| MRPL4              | 19 | 10369185  | C | G | C | c.C649G  | p.L217V  | exon7  | NM_015956    | NA          | 0.000000 | 6 |
| C19orf44           | 19 | 16620790  | T | C | C | c.T1630C | p.W544R  | exon5  | NM_001288834 | NA          | 0.000000 | 4 |
| FKBP8              | 19 | 18652762  | G | A | C | c.C19T   | p.P7S    | exon2  | NM_001308373 | NA          | 0.000000 | 2 |

medRxiv preprint doi: <https://doi.org/10.1101/2023.08.24.23294455>; this version posted August 25, 2023. The copyright holder for this preprint (which was not certified by peer review) is the author/funder, who has granted medRxiv a license to display the preprint in perpetuity. It is made available under a CC-BY 4.0 International license.

| Gene     | Chromosome | Position (kb) | Reference Allele | Variant Allele | Variant Type | Gene     | Transcript | Exon   | RefSeq ID    | Variant ID  | Frequency |
|----------|------------|---------------|------------------|----------------|--------------|----------|------------|--------|--------------|-------------|-----------|
| GRAMD1A  | 19         | 35814392      | A                | G              | C            | c.A454C  | p.S64G     | exon17 | NM_01136199  | rs190168534 | 0.000415  |
| FFAR2    | 19         | 35941491      | G                | T              | C            | c.G4362T | p.E1454D   | exon32 | NM_001083961 | NA          | 0.000000  |
| WDR62    | 19         | 36595720      | G                | T              | C            | c.G379T  | p.V127L    | exon4  | NM_001243116 | NA          | 0.000000  |
| NFKB1B   | 19         | 39397878      | G                | T              | C            | c.G379T  | p.V127L    | exon4  | NM_001243116 | NA          | 0.000000  |
| SARS2    | 19         | 39406709      | T                | A              | C            | c.A1315T | p.T439S    | exon14 | NM_017827    | rs200202461 | 0.000416  |
| PAK4     | 19         | 39664500      | C                | A              | C            | c.C489A  | p.D163E    | exon3  | NM_001014834 | NA          | 0.000000  |
| CEACAM5  | 19         | 42219668      | A                | G              | C            | c.A803G  | p.Q268R    | exon4  | NM_001291484 | NA          | 0.000413  |
| SIX5     | 19         | 46269328      | C                | T              | C            | c.G1651A | p.V551M    | exon3  | NM_175875    | NA          | 0.000000  |
| CCDC8    | 19         | 46915205      | C                | T              | C            | c.G863A  | p.G288E    | exon1  | NM_032040    | rs201827579 | 0.000000  |
| CRX      | 19         | 48342884      | C                | T              | C            | c.C560T  | p.T187I    | exon4  | NM_000554    | NA          | 0.000414  |
| HAS1     | 19         | 52217119      | C                | G              | C            | c.G1295C | p.W432S    | exon5  | NM_001297436 | NA          | 0.000855  |
| ZNF468   | 19         | 53348534      | A                | G              | C            | c.T158C  | p.I53T     | exon4  | NM_001277120 | rs73069429  | 0.000000  |
| LAIR1    | 19         | 54866948      | G                | A              | C            | c.C739T  | p.R247W    | exon9  | NM_001289023 | rs200218727 | 0.000000  |
| RDH13    | 19         | 55568152      | C                | T              | C            | c.G209A  | p.R70Q     | exon3  | NM_001145971 | NA          | 0.000000  |
| ZNF628   | 19         | 55994880      | A                | G              | C            | c.G2320A | p.V774I    | exon3  | NM_033113    | NA          | 0.000426  |
| ZNF154   | 19         | 58213953      | C                | T              | C            | c.G364A  | p.G122S    | exon3  | NM_001085384 | rs202082426 | 0.000000  |
| STK35    | 20         | 2082672       | G                | A              | C            | c.G145A  | p.A49T     | exon1  | NM_080836    | NA          | 0.000618  |
| SIGLEC1  | 20         | 3687141       | C                | A              | C            | c.G262T  | p.E88X     | exon2  | NM_023068    | rs150358287 | 0.000826  |
| HSPA12B  | 20         | 3729935       | G                | A              | C            | c.G904A  | p.V302I    | exon9  | NM_001197327 | NA          | 0.000000  |
| SLX4IP   | 20         | 10579389      | C                | G              | C            | c.C305G  | p.T102R    | exon5  | NM_001009608 | rs199963485 | 0.000568  |
| RRBP1    | 20         | 17640746      | G                | T              | C            | c.C407A  | p.P136H    | exon2  | NM_004587    | rs200124781 | 0.000000  |
| BCL2L1   | 20         | 30309628      | G                | C              | C            | c.C394G  | p.R132G    | exon2  | NM_138578    | NA          | 0.000000  |
| NECAB3   | 20         | 32247379      | C                | T              | C            | c.G803A  | p.G268D    | exon8  | NM_031232    | NA          | 0.000836  |
| MYH7B    | 20         | 33583163      | G                | A              | C            | c.G2851A | p.E951K    | exon28 | NM_020884    | rs370896124 | 0.000535  |
| BPI      | 20         | 36938936      | A                | G              | C            | c.A430G  | p.I144V    | exon4  | NM_001725    | rs144469725 | 0.000826  |
| SNX21    | 20         | 44462562      | C                | T              | C            | c.C4T    | p.H2Y      | exon1  | NM_001042632 | NA          | 0.000000  |
| SULF2    | 20         | 46305861      | T                | A              | C            | c.A1211T | p.K404M    | exon9  | NM_001161841 | NA          | 0.000000  |
| SPATA2   | 20         | 48524990      | T                | C              | C            | c.A38G   | p.D13G     | exon2  | NM_001135773 | NA          | 0.000413  |
| NRIP1    | 21         | 16338385      | C                | T              | C            | c.G2129A | p.R710H    | exon4  | NM_003489    | NA          | 0.000000  |
| PFKL     | 21         | 45725785      | C                | T              | C            | c.C202T  | p.P68S     | exon4  | NM_001002021 | rs138883373 | 0.000000  |
| TRPM2    | 21         | 45821691      | C                | T              | C            | c.C2449T | p.L817F    | exon16 | NM_003307    | NA          | 0.000413  |
| C21orf58 | 21         | 47734824      | C                | T              | C            | c.G97A   | p.V33M     | exon4  | NM_001286463 | rs75798864  | 0.000000  |
| IL17RA   | 22         | 17584415      | A                | G              | C            | c.A794G  | p.N265S    | exon8  | NM_001289905 | rs201250724 | 0.000000  |
| CECR2    | 22         | 17983890      | C                | G              | C            | c.C223G  | p.P75A     | exon7  | NM_001290046 | NA          | 0.000413  |
| SLC25A18 | 22         | 18070827      | G                | A              | C            | c.G712A  | p.A238T    | exon8  | NM_001303484 | NA          | 0.000000  |
| CABIN1   | 22         | 24561553      | A                | T              | C            | c.A4816T | p.T1606S   | exon30 | NM_001201429 | NA          | 0.000000  |
| TFIP11   | 22         | 26894893      | C                | G              | C            | c.G1378C | p.E460Q    | exon10 | NM_012143    | NA          | 0.000000  |
| RHBDD3   | 22         | 29656346      | A                | G              | C            | c.T952C  | p.W318R    | exon6  | NM_012265    | NA          | 0.000000  |
| SLC5A4   | 22         | 32650193      | A                | G              | C            | c.T143C  | p.L48P     | exon2  | NM_014227    | NA          | 0.000000  |
| MYH9     | 22         | 36688118      | G                | C              | C            | c.C4258G | p.Q1420E   | exon31 | NM_002473    | rs200510675 | 0.000000  |
| IL2RB    | 22         | 37524507      | G                | A              | C            | c.C1285T | p.L429F    | exon10 | NM_000878    | NA          | 0.000434  |
| SLC16A8  | 22         | 38477353      | T                | C              | C            | c.A692G  | p.E231G    | exon4  | NM_013356    | NA          | 0.000480  |
| BAIAP2L2 | 22         | 38484968      | G                | A              | C            | c.C905T  | p.S302L    | exon10 | NM_025045    | NA          | 0.000430  |
| GTSE1    | 22         | 46712073      | G                | A              | C            | c.G1196A | p.R399Q    | exon7  | NM_016426    | NA          | 0.000000  |
| CELSR1   | 22         | 46931599      | T                | C              | C            | c.A1469G | p.Q490R    | exon1  | NM_014246    | rs200630932 | 0.000000  |
| OFD1     | X          | 13779315      | C                | T              | C            | c.C2372T | p.P791L    | exon17 | NM_003611    | NA          | 0.000826  |
| DMD      | X          | 31697509      | T                | C              | C            | c.A475G  | p.K159E    | exon10 | NM_004013    | NA          | 0.000000  |
| CXorf67  | X          | 51151176      | C                | G              | C            | c.C1308G | p.N436K    | exon1  | NM_203407    | NA          | 0.000000  |
| WDR44    | X          | 117532396     | C                | A              | C            | c.C1162A | p.P388T    | exon7  | NM_001184966 | NA          | 0.000827  |
| DCAF12L1 | X          | 125685729     | A                | T              | C            | c.T863A  | p.L288Q    | exon1  | NM_178470    | NA          | 0.000000  |
| UBL4A    | X          | 153713967     | G                | C              | C            | c.C385G  | p.R129G    | exon4  | NM_014235    | NA          | 0.000852  |
| UBL4A    | X          | 153713969     | C                | A              | C            | c.G383T  | p.S128I    | exon4  | NM_014235    | NA          | 0.000000  |

<sup>a</sup>Physical position in UCSC Genome Browser in Human Feb. 2009 Human GRCh37/hg19 Assembly.

<sup>b</sup>Reference allele in UCSC Genome Browser.

<sup>c</sup>Allele observed in this study.

<sup>d</sup>Allele frequency in Japanese in Human Genetic Variation Database (<https://www.hgvd.genome.med.kyoto-u.ac.jp/>).

<sup>e</sup>Number of methods for predicting variant as deleterious.

Supplementary Table3. *De novo* variants in each family

| Gene symbol   | Family | No. of predictions <sup>a</sup> | Chr | Position <sup>b</sup> | Ref <sup>c</sup> | Alt <sup>d</sup> | Substitution |            |        | SNV          | Frequency     |                       | Gene description | Gene expression <sup>g</sup>                                      |                                     |
|---------------|--------|---------------------------------|-----|-----------------------|------------------|------------------|--------------|------------|--------|--------------|---------------|-----------------------|------------------|-------------------------------------------------------------------|-------------------------------------|
|               |        |                                 |     |                       |                  |                  | cDNA         | Amino acid | Exon   |              | Transcript ID | Japanese <sup>e</sup> |                  |                                                                   | European <sup>f</sup> (non-Finnish) |
| <i>MYO18B</i> | P5     | 4                               | 22  | 26177721              | C                | G                | c.C2232G     | c.C2232G   | exon10 | NM_032608    | rs3718444616  | 0.000507              | 0.000000         | Myosin XVIIB                                                      | Skeletal muscle, heart              |
| <i>BTAF1</i>  | P7     | 4                               | 10  | 93748956              | C                | G                | c.C2473G     | p.P825A    | exon20 | NM_003972    | rs774232595   | 0.000000              | 0.000000         | BTAF1 RNA polymerase II, B-TFIIID transcription factor-associated | Lymphocyte, nerve                   |
| <i>EED</i>    | P11    | 1                               | 11  | 85981134              | G                | A                | c.G976A      | p.A326T    | exon10 | NM_001308007 | rs1023860960  | 0.000000              | 0.000000         | Embryonic ectoderm development                                    | Lymphocyte, brain                   |
| <i>MUC3A</i>  | P15    | 0                               | 7   | 100550974             | A                | G                | c.A1555G     | p.T519A    | exon2  | NM_005960    | NA            | 0.000000              | 0.000000         | Mucin-3A                                                          | Small intestine, colon              |

Abbreviations: NA, not applicable

<sup>a</sup>Number of methods for predicting deleterious variant.

<sup>b</sup>Physical position in UCSC Genome Browser in Human Feb. 2009 Human GRCh37/hg19 Assembly.

<sup>c</sup>Reference allele in UCSC Genome Browser.

<sup>d</sup>Allele observed in this study.

<sup>e</sup>Allele frequency in Japanese in Human Genetic Variation Database (<https://www.hgvdb.genome.med.kyoto-u.ac.jp/>).

<sup>f</sup>Allele frequency in European gnomAD (<https://gnomad.broadinstitute.org/>).

<sup>g</sup>Top two tissues showing highest expression level in GTEx (release V8, 54 non-diseased tissue sites across nearly 1000 individuals)

Supplementary Table4. Splice site variants in each family

| Gene symbol    | Family | Chr | Position <sup>a</sup> | Ref <sup>b</sup> | Alt <sup>c</sup> | Splice region   | Substitution | SNV         | Frequency             |                                        | Gene description                                              | Gene expression <sup>f</sup> |
|----------------|--------|-----|-----------------------|------------------|------------------|-----------------|--------------|-------------|-----------------------|----------------------------------------|---------------------------------------------------------------|------------------------------|
|                |        |     |                       |                  |                  |                 |              |             | Japanese <sup>d</sup> | European <sup>e</sup><br>(non-Finnish) |                                                               |                              |
| <i>ATG7</i>    | P4     | 3   | 11468277              | G                | C                | splice acceptor | AG→AC        | rs756690200 | 0.000000              | 0.000008                               | Autophagy related 7                                           | Fibroblast, esophagus        |
| <i>WDR45B</i>  |        | 17  | 80579677              | T                | G                | splice acceptor | AG→CG        | NA          | 0.000000              | 0.000000                               | WD repeat domain 45B                                          | Testis, fallopian tube       |
| <i>HBD</i>     | P11    | 11  | 5255444               | C                | T                | splice acceptor | AG→AA        | rs35408031  | 0.000000              | 0.000026                               | Hemoglobin, delta                                             | Whole blood, spleen          |
| <i>LILRB3</i>  |        | 19  | 54721187              | C                | T                | splice donor    | GT→AT        | rs147121453 | 0.000000              | 0.000134                               | Leukocyte immunoglobulin-like receptor, subfamily B, member 3 | Whole blood, spleen          |
| <i>FAM216B</i> | P15    | 13  | 43361020              | G                | T                | splice donor    | GT→TT        | NA          | 0.000413              | 0.000000                               | Family with sequence similarity 216, member B                 | Heart, fallopian tube        |

Abbreviations: NA, not applicable

<sup>a</sup>Physical position in UCSC Genome Browser in Human Feb. 2009 Human GRCh37/hg19 Assembly.

<sup>b</sup>Reference allele in UCSC Genome Browser.

<sup>c</sup>Allele observed in this study.

<sup>d</sup>Allele frequency in Japanese in Human Genetic Variation Database (<https://www.hgvd.genome.med.kyoto-u.ac.jp/>).

<sup>e</sup>Allele frequency in European gnomAD (<https://gnomad.broadinstitute.org/>).

<sup>f</sup>Top two tissues showing highest expression level in GTEx (release V8, 54 non-diseased tissue sites across nearly 1000 individuals)
